1 **Augmenting electronic health record data with social and environmental determinant of**  
2 **health measures to understand regional factors associated with asthma exacerbations**

3 Alana Schreibman<sup>1</sup>, Kimberly Lactaen<sup>1</sup>, Jaehyun Joo<sup>1</sup>, Patrick K. Gleeson<sup>2</sup>, Gary E.

4 Weissman<sup>1,2</sup>, Andrea J. Apter<sup>2</sup>, Rebecca A. Hubbard<sup>3</sup>, Blanca E. Himes<sup>1</sup>

5

6 <sup>1</sup>Department of Biostatistics, Epidemiology and Informatics, Perelman School of Medicine,

7 University of Pennsylvania, Philadelphia, PA 19104

8 <sup>2</sup>Division of Pulmonary, Allergy and Critical Care Medicine, Perelman School of Medicine,

9 University of Pennsylvania, Philadelphia, PA 19104

10 <sup>3</sup>Department of Biostatistics, School of Public Health, Brown University, Providence, RI 02912

11

12 Corresponding author:

13 Blanca E Himes, PhD

14 402 Blockley Hall

15 423 Guardian Drive

16 Philadelphia, PA 19104

17 Phone: (215) 573-3282

18 Email: [bhimes@pennmedicine.upenn.edu](mailto:bhimes@pennmedicine.upenn.edu)

19 **Abstract**

20 Electronic health records (EHRs) provide rich data for diverse populations but often lack  
21 information on social and environmental determinants of health (SEDH) that are important for  
22 the study of complex conditions such as asthma, a chronic inflammatory lung disease. We  
23 integrated EHR data with seven SEDH datasets to conduct a retrospective cohort study of 6,656  
24 adults with asthma. Using Penn Medicine encounter data from January 1, 2017 to December 31,  
25 2020, we identified individual-level and spatially-varying factors associated with asthma  
26 exacerbations. Black race and prescription of an inhaled corticosteroid were strong risk factors  
27 for asthma exacerbations according to a logistic regression model of individual-level risk. A  
28 spatial generalized additive model (GAM) identified a hotspot of increased exacerbation risk  
29 (mean OR = 1.42, SD 0.14,  $p < 0.001$ ), and inclusion of EHR-derived variables in the model  
30 attenuated the spatial variance in exacerbation odds by 33.8%, while additionally adjusting for  
31 the SEDH variables attenuated the spatial variance in exacerbation odds by 67.2%. Additional  
32 spatial GAMs adjusted one variable at a time revealed that neighborhood deprivation (OR =  
33 1.05, 95% CI: 1.03, 1.07), Black race (OR = 1.66, 95% CI: 1.44, 1.91), and Medicaid health  
34 insurance (OR = 1.30, 95% CI: 1.15, 1.46) contributed most to the spatial variation in  
35 exacerbation odds. In spatial GAMs stratified by race, adjusting for neighborhood deprivation  
36 and health insurance type did not change the spatial distribution of exacerbation odds. Thus,  
37 while some EHR-derived and SEDH variables explained a large proportion of the spatial  
38 variance in asthma exacerbations across Philadelphia, a more detailed understanding of SEDH  
39 variables that vary by race is necessary to address asthma disparities. More broadly, our findings  
40 demonstrate how integration of information on SEDH with EHR data can improve understanding  
41 of the combination of risk factors that contribute to complex diseases.

42 **Author summary**

43 Electronic health records constitute an important source of data for understanding the health of  
44 large and diverse real-world populations, however, they do not routinely capture socioeconomic  
45 and environmental factors known to affect health outcomes. We show how electronic health  
46 record data can be augmented to include individual measures of air pollution exposures,  
47 neighborhood socioeconomic status, and the natural and built environment using patients’  
48 residential addresses to study asthma exacerbations, episodes of worsening disease that remain a  
49 major public health challenge in the United States. We found that on an individual patient-level,  
50 Black race and prescription of an inhaled corticosteroid were the factors most strongly associated  
51 with asthma exacerbations. In contrast, neighborhood deprivation, race, and health insurance  
52 type accounted for the most spatial variation in exacerbation risk across Philadelphia. Our  
53 findings provide insight into factors that contribute to asthma disparities in our region and  
54 present a framework for future efforts to expand the scope of electronic health record data.

55

## 56 **Introduction**

57 Electronic health records (EHRs) are a source of rich patient-level data for large and diverse  
58 populations that can be used for research due to their widespread availability [1]. However, EHR  
59 data often contain incomplete or low-quality measures of social and environmental determinants  
60 of health (SEDH), limiting their utility for the study of complex diseases [2]. Recent efforts to  
61 address this limitation have included developing methodologies to integrate external data on the  
62 physical, built, and social environment via linkage with patient addresses [3–5], with high-  
63 resolution geospatial datasets providing the closest estimate of individual exposures [6].  
64 Integrated EHR and SEDH datasets can be used to understand both individual-level outcomes  
65 and patterns of risk across a spatial region, thereby providing insights for both precision  
66 medicine and precision public health efforts. Because many environmental exposures pose a  
67 greater risk to select groups of people, integrating external information on SEDH with EHR data  
68 is also helpful to address health disparities according to race, ethnicity, and socioeconomic  
69 status.

70         Asthma, a chronic disease that is characterized by inflammation and reversible narrowing  
71 of the airways, affects over 25 million people or approximately 8% of the United States  
72 population [7]. Racial and ethnic disparities in its morbidity and mortality are well known, and  
73 those living in poverty are also more likely to have asthma [7–11]. The clinical goals of asthma  
74 management are to control patients' symptoms and minimize long-term risk of lung function  
75 decline [12]. This includes preventing asthma exacerbations, episodes of worsening disease  
76 which require treatment with systemic steroids [13]. However, despite guideline-directed clinical  
77 management, asthma exacerbations remain common, contributing to asthma-related morbidity  
78 and mortality as well as higher health care costs and utilization [14,15]. Risk factors for asthma

79 exacerbations in adults include female sex [16], obesity [17], current or past smoking [18],  
80 comorbid allergic rhinitis or chronic obstructive pulmonary disease (COPD) [17,19], and a  
81 history of previous exacerbations [20]. Observational studies have also found independent  
82 associations between asthma exacerbations and exposure to particulate matter (PM), gaseous air  
83 pollutants, and to mixtures of pollutants such as traffic-related air pollution (TRAP) [21].  
84 Similarly, associations between asthma exacerbations and living in poverty [22], substandard  
85 housing conditions, such as the presence of mold and pests [23,24], and neighborhood  
86 “greenness” [25,26] have been documented.

87         Because asthma exacerbations result from complex interactions among various  
88 biological, social, and environmental factors that vary across individuals and geographically,  
89 creating generalizable models of exacerbations remains an unachieved goal. Further, because in  
90 the United States there is a high correlation between minoritized race or ethnicity, poverty, and  
91 harmful environmental exposures, disentangling relationships among key variables is difficult  
92 [9,27]. Approaches that model many asthma-related variables in specific regions may lead to the  
93 identification of actionable strategies to reduce exacerbations locally, and using EHR data to  
94 create these models has the advantage of providing health information for the specific catchment  
95 region served by a given healthcare system. Few studies have linked EHRs with a diverse set of  
96 SEDH variables to study asthma exacerbations using patient-level data [28–30], and to our  
97 knowledge, none have used geospatial analysis techniques to understand the contribution of  
98 these factors to the spatial distribution of exacerbation risk. Here, we show how EHR data can be  
99 extended to include individualized measures of air pollution exposures, socioeconomic status  
100 indices, and measures of the natural and built environment to identify local factors associated  
101 with asthma exacerbation risk.

102

## 103 **Methods**

104 A retrospective cohort analysis was performed using de-identified EHR data from Penn  
105 Medicine, a large health system that serves the greater Philadelphia area, from encounters dated  
106 1/1/2017-12/31/2020. Our study was approved by the University of Pennsylvania Institutional  
107 Review Board (IRB) under protocol number 824789. An overview of our study design is shown  
108 in Fig 1.

109

### 110 Study population

111 Patient-level encounter data was obtained for adults (i.e. age  $\geq$  18 years) who had at least one  
112 encounter with an International Classification of Diseases (ICD)-10 code for asthma (J45\*) and  
113 who were prescribed a short-acting  $\beta_2$ -agonist (SABA) (S1 Table). The most recent residential  
114 address for each patient was obtained and geocoded using previously described methods [3].  
115 Demographic, comorbidity, and medication data for encounters during the study period was  
116 extracted and used to compute several variables, hereafter referred to as “EHR-derived  
117 variables.” These included: age at first encounter, sex, race, ethnicity, body mass index (BMI),  
118 health insurance type, smoking status, chronic obstructive pulmonary disease (COPD), allergic  
119 rhinitis, a modified Elixhauser score [31], inhaled corticosteroid (ICS) prescription, and years  
120 followed (defined as the number of years between first and last encounter). Additional details,  
121 including inclusion and exclusion criteria and definitions of the EHR-derived variables, are  
122 provided in S1 Text.

123

### 124 Outcome

125 Asthma exacerbations were defined as encounters with an oral corticosteroid (OCS) prescription  
126 (S1 Table) and either 1) a primary asthma diagnosis code (ICD-10, J45\*) for encounters with  
127 primary diagnosis codes listed or 2) a nonprimary asthma ICD-10 code for encounters without a  
128 primary diagnosis listed but only one or two ICD-10 codes listed. A count of exacerbations  
129 during the study period was computed for each patient.

130

### 131 SEDH data

132 Seven external datasets were integrated with our EHR dataset via linkage with patient geocodes,  
133 creating variables that are hereafter referred to as “SEDH variables.” Additional details on data  
134 processing are reported in S1 Text, and dataset sources and spatiotemporal dimensions are  
135 summarized in S2 Table. All processed SEDH data is available in Sensor-based Analysis of  
136 Pollution in the Philadelphia Region with Information on Neighborhoods and the Environment  
137 (SAPPHIRINE), a web application that integrates spatially distributed high-resolution social and  
138 environmental data in the greater Philadelphia region to facilitate the conduct of local health  
139 studies [32].

140

### 141 *Air pollution exposures*

142 Average pollutant exposures were assigned to each patient using high-resolution (~1x1 km<sup>2</sup>)  
143 geophysical model estimates. 2017-2019 NO<sub>2</sub> estimates (in parts per billion by volume, or ppbv)  
144 and 2017-2020 PM<sub>2.5</sub> estimates (in µg/m<sup>3</sup>) were downloaded from resources reported in Cooper  
145 et al. and van Donkelaar et al., respectively, temporally averaged, and linked to the study cohort  
146 using bilinear interpolation [33,34]. Exposure to other toxic airborne chemicals from point  
147 sources was estimated using the EPA Toxic Release Inventory (TRI) [35]. Total toxic air release

148 exposure by patient was computed as the sum of toxic releases (in kilograms) over the study  
149 period within a 1-km circular buffer of each patient's residential address. Exposure to air  
150 pollution from mobile sources was estimated as the sum of the daily vehicle distance traveled  
151 (DVDT), a metric computed using traffic data published by the Pennsylvania Department of  
152 Transportation, within a 300-m circular buffer [36].

153

#### 154 *Neighborhood socioeconomic environment*

155 Socioeconomic disadvantage for each person was summarized as the Area Deprivation Index  
156 (ADI), a validated index computed for each Census block group based on several ACS variables  
157 [37]. A higher ADI score indicates greater disadvantage. 2018 ADI data was extracted from the  
158 Neighborhood Atlas and was assigned to each patient by block group [38].

159

#### 160 *Built and natural environment*

161 Asthma-related housing code violation data (i.e. pests, water damage, and indoor air  
162 contamination) was obtained from a Philadelphia Department of Licenses and Inspections  
163 dataset reported by OpenDataPhilly (S3 Table) [39]. For each block group, the number of  
164 violations during the study period per 100 people (based on the 2019 ACS population estimates)  
165 was computed and assigned to each patient. Vegetation density was summarized as the  
166 normalized difference vegetation index (NDVI), an index with values ranging from -1.0 to 1.0  
167 where higher positive values represent higher vegetation density. NDVI was computed in Google  
168 Earth Engine using surface reflectance images from the Landsat 8 satellite during the study  
169 period and assigned to each patient as the mean value within a 300-m circular buffer [40].

170



171 Statistical analysis

172 Analyses were conducted in R 4.2 [41].

173

174 *Study area*

175 To minimize bias in our geospatial analyses introduced by uneven spatial density across the Penn

176 Medicine catchment area, we restricted our study region to spatial areas in which the geospatial

177 representativeness of our EHR cohort was adequate compared to the underlying population.

178 Following methods described in Xie et al. [42], we computed a spatial representation ratio

179 (SRR), defined as the ratio between the proportion of our EHR cohort living in each census

180 block group and the proportion of the Philadelphia population living in that block group, as

181 reported by the 2019 American Community Survey (ACS). We defined our study region as

182 contiguous census tracts (i.e. adjacent or separated by a non-residential area such as a park) with

183 a mean SRR of 0.5 or greater. Only patients who resided in this study region were included in

184 analyses.

185

186 *Modeling individual-level risk factors*

187 Chi-squared and Kruskal-Wallis rank sum tests were used in bivariate analyses to assess

188 associations between patient characteristics and asthma exacerbation level (i.e. 0, 1-2, 3-4, 5+)

189 during the study period, and to compare the characteristics of complete cases to individuals with

190 missing data. To identify patient-level factors associated with asthma exacerbations, we fit

191 logistic regression models with asthma exacerbations as a binary case-control (0 vs >0) outcome.

192 This approach was chosen to match the dichotomous outcome used in spatial analyses. Logistic

193 regression models were initially adjusted for EHR-derived variables only, and then adjusted for

194 both EHR-derived and SEDH variables (EHR & SEDH-adjusted). Years followed was included  
195 as a covariate in both models to account for variation in the length of available follow-up across  
196 patients. Model fit was assessed using the Akaike information criterion (AIC). We checked for  
197 multicollinearity by computing Pearson’s correlation coefficients between all EHR and SEDH  
198 variables, while selecting White race and Private health insurance type as reference levels for the  
199 two nominal categorical variables, and we computed variance inflation factors (VIF) for all  
200 independent variables.

201

### 202 *Sensitivity analysis for individual-level risk factors*

203 We conducted sensitivity analyses of individual-level risk factors by fitting negative binomial  
204 regression models with asthma exacerbations represented as a count outcome and comparing  
205 results to those of logistic regression models. The negative binomial regression models were  
206 adjusted first for EHR-derived variables only and then for EHR & SEDH variables, while  
207 including years followed as an offset in each model.

208

### 209 *Modeling spatial risk factors*

210 To estimate local odds of exacerbation as a function of location, spatial generalized additive  
211 models (GAMs) were fit with a binary case-control outcome (0 vs >0 exacerbations) on a grid of  
212 points across the study region, using the R *MapGAM* package and previously described methods  
213 (S1 Text) [3,43]. Maps of spatial effect predictions were created for the smoothed spatial term of  
214 each model, where the spatial odds ratio (OR) at each point represented the ratio between the  
215 odds of exacerbation at that point and the median odds across all points. First, a univariable  
216 model adjusted only for years followed, hereafter referred to as “unadjusted model”, was fit to

217 identify hotspots and coldspots across the study region. Next, multivariable models adjusted for  
218 1) only EHR-derived variables and 2) EHR & SEDH variables were compared to the unadjusted  
219 model by computing the mean and standard deviation (SD) of the spatial ORs at points within  
220 any overlapping hotspots, and by computing the percent difference between the variance in ORs  
221 across the full study region in the adjusted models and the unadjusted model. To understand the  
222 contribution of individual variables to the observed spatial effects, we fit additional models  
223 adjusted for each EHR-derived or SEDH variable one variable at a time (all models were also  
224 adjusted for years followed) and computed the percent difference between the variance in ORs in  
225 these models and the unadjusted model. Model fit was assessed using the AIC.

226

### 227 *Stratified analysis*

228 We conducted a stratified analysis to further evaluate the association between race and asthma  
229 exacerbations. Chi-square and Wilcoxon rank sum tests were used to assess bivariate  
230 relationships between race and other variables. To test whether any EHR or SEDH variables that  
231 were correlated with race influenced spatial patterns of asthma exacerbation risk independently  
232 of race, spatial GAMs adjusted one variable at a time were fit on each race stratum using the  
233 same approach described above. Before fitting the models, SRR selection was repeated for each  
234 stratum to account for the uneven geographic distribution of race across the initial study region.

235

## 236 **Results**

237 Following selection of patients based on inclusion/exclusion criteria and spatial filtering (S1  
238 Fig), the retrospective study cohort consisted of 6,656 asthma patients, 2,329 of whom had one  
239 or more exacerbations (Table 1), with residence in 249 census tracts in Philadelphia (S2 Fig).

240 The spatial distribution of all processed SEDH datasets within the study region is shown in S3  
241 Fig. The EHR-derived variables years followed, age, race, BMI, health insurance type, smoking  
242 status, COPD, allergic rhinitis, Elixhauser comorbidity score, and ICS, as well as the SEDH  
243 variable ADI were the most significantly associated with exacerbations according to bivariate  
244 analyses ( $p < 0.001$ ) (Table 1). Patients with more exacerbations during the study period were  
245 followed for more years, more likely to be aged 35-54, of Black race, or class 2 or class 3 obese,  
246 and more likely to have Medicaid health insurance, a history of smoking, COPD, allergic rhinitis,  
247 higher Elixhauser comorbidity scores, an ICS prescription, or live in neighborhoods with higher  
248 ADI. The proportion of patients in the study cohort who were prescribed controller medications  
249 including ICS, leukotriene modifiers, long-acting  $\beta_2$ -agonists (LABA), and biologic therapies  
250 was positively associated with exacerbation count (S4 Table). Bivariate analyses comparing the  
251 distribution of characteristics between the study cohort and patients excluded due to missing  
252 EHR data found statistically significant differences in years followed, age, sex, health insurance  
253 type, COPD, allergic rhinitis, Elixhauser comorbidity score, and ICS ( $p < 0.001$ ) (S5 Table).

254 Based on Pearson's correlation coefficients, there were no strong correlations between  
255 any EHR-derived or SEDH variables, except for  $\text{NO}_2$  and  $\text{PM}_{2.5}$  ( $\rho = 0.77$ ) (S4 Fig). Moderate  
256 correlations ( $|\rho| > 0.50$ ) were observed between age and Medicare health insurance, Black race  
257 and ADI, and  $\text{NO}_2$  and NDVI. Furthermore, adjusted generalized VIFs for all variables did not  
258 exceed 2.00, suggesting that all variables could be included in multivariable models (S6 Table).

259

#### 260 Individual risk factors associated with asthma exacerbations

261 ORs for the EHR-derived and SEDH variables included in the multivariable logistic regression  
262 model are summarized in Table 2. The EHR-derived variables years followed, age 35-54, Black

263 race, and ICS had the strongest positive associations with having at least one exacerbation during  
264 the study period ( $p < 0.001$ ) (Table 2). These effects persisted after additionally adjusting for  
265 SEDH variables, and of the SEDH variables in the logistic regression model, only  $\text{NO}_2$  exposure  
266 was positively associated with exacerbations ( $p = 0.0058$ ). Inclusion of the SEDH variables did  
267 not improve model fit as determined by AIC (8,323 versus 8,322). Sensitivity analyses showed  
268 that the risk factors identified by logistic and negative binomial regression models were mostly  
269 consistent, with Black race and ICS prescription having the strongest effects between both  
270 models ( $p < 10^{-4}$ ), and variables such as Medicaid health insurance and Elixhauser comorbidity  
271 score of 1-9 having statistically significant p-values in both models though smaller in the  
272 negative binomial regression ( $p < 0.001$ ) than the logistic regression ( $p < 0.05$ ) (S7 Table).  
273 However, the negative binomial regression model did not identify statistically significant  
274 associations between asthma exacerbations and age 35-54 or  $\text{NO}_2$  exposure as did the logistic  
275 regression, although the directions of effect were consistent in both models. In addition, the  
276 negative binomial regression model identified an association with the SEDH variable housing  
277 code violations ( $p = 0.044$ ) that was not present in the logistic regression model.

278

### 279 Spatial risk factors associated with exacerbations

280 Maps of ORs across the study region for the unadjusted, EHR-adjusted, and EHR & SEDH-  
281 adjusted spatial GAMs are shown in Fig 2. In the unadjusted model, the global test of the null  
282 hypothesis that asthma exacerbations were not associated with geographic location was  
283 significant ( $p < 0.001$ ) (Fig 2A). Local tests identified a statistically significant hotspot of  
284 exacerbations ( $p < 0.01$ ) in West and South Philadelphia with a mean spatial OR of 1.42 (SD  
285 0.14). In the model adjusted for EHR-derived variables (Fig 2B) the global test statistic remained

286 significant ( $p < 0.001$ ). Local tests again identified a hotspot ( $p < 0.01$ ) in West and South  
287 Philadelphia which had a decreased mean spatial OR of 1.27 (SD 0.057). In this EHR-adjusted  
288 model, the variance in spatial ORs across the study region was 33.8% lower than the variance of  
289 the unadjusted model (S5 Fig). In the model adjusted for both EHR-derived and SEDH variables,  
290 the global test statistic remained significant ( $p < 0.001$ , Fig 2C) and local tests identified a  
291 hotspot ( $p < 0.01$ ) in West Philadelphia that overlapped geographically with the one in the other  
292 models, although of a smaller area and with a smaller mean spatial OR of 1.24 (SD 0.040)  
293 compared to the EHR-adjusted model. The variance in spatial ORs in the EHR & SEDH-  
294 adjusted model was strongly attenuated (67.2% lower than that of the unadjusted model),  
295 suggesting that these variables partially explained the spatial correlation of exacerbations (S5  
296 Fig). The ORs for the other terms included in the spatial GAMs (i.e., the EHR-derived and  
297 SEDH variables) are summarized in Table 3. All variables (i.e., years followed, age 35-54, Black  
298 race, class 3 obesity, Medicaid health insurance, Elixhauser score 1-9, ICS) that were significant  
299 in the multivariable logistic regression models (Table 2) were also significant in the spatial  
300 GAMs (Table 3), except for  $\text{NO}_2$  exposure, which was significant in the logistic regression  
301 model but not in the spatial GAM.

302 In the spatial GAM models adjusted one variable at a time, ADI, race, and health  
303 insurance type most strongly attenuated the variation in spatial ORs (Fig 3), individually  
304 accounting for 55.2%, 38.5%, and 26.4%, respectively, of the variation in the unadjusted model  
305 (S5 Fig). In these models, each variable was positively associated with exacerbations ( $p <$   
306  $0.001$ ): ADI with OR = 1.05 (95% CI: 1.03, 1.07); Black race with OR = 1.66 (95% CI: 1.44,  
307 1.91); and Medicaid health insurance with OR = 1.30 (95% CI: 1.15, 1.46) (S8 Table). The  
308 spatial distribution of these variables followed similar patterns: high ADI and high density of

309 Black patients and patients with Medicaid insurance cooccurred in West, North, and South  
310 Philadelphia (Fig 3). No other EHR (S6 Fig) or SEDH (S7 Fig) variable attenuated the hotspot  
311 area or its effect size, however, adjustment for NO<sub>2</sub> levels resulted in an expansion of a coldspot  
312 area (S7A Fig).

313

#### 314 Stratified analysis by race

315 Bivariate analysis comparing the distribution of all EHR and SEDH characteristics between  
316 patients of Black and White race found statistically significant differences for all variables  
317 except ethnicity and ICS (Table 4). Given that ADI, race, and health insurance type had the  
318 strongest relationship with asthma exacerbations in spatial analyses, and their spatial  
319 distributions were similar, we performed stratified spatial analyses by race to determine whether  
320 ADI and health insurance status remained significantly associated with asthma exacerbations  
321 within race-stratified groups. After applying SRR inclusion criteria in strata according to race, an  
322 additional 265 Black patients were excluded from the stratified spatial analysis, resulting in a  
323 sample size of 4,363 patients (Fig 4A). The unadjusted spatial GAM for patients of Black race  
324 had a significant global test statistic ( $p < 0.001$ ) and local tests identified hotspots in West and  
325 South Philadelphia consistent with results of the full cohort (Fig 4B). In contrast to spatial  
326 analyses in the full cohort, adjusting for ADI and health insurance separately for Black patients  
327 did not attenuate the spatial variance in ORs, instead increasing the variance by 4.70% and  
328 2.68%, respectively, compared to the unadjusted model (Fig 4C and 4D). In patients of White  
329 race, 73 additional patients were removed after applying SRR inclusion criteria, resulting in  
330 1,383 patients included in the spatial model for which the global test statistic was no longer  
331 significant ( $p = 0.079$ , S8 Fig).

332

### 333 **Discussion**

334 Our analysis of individual-level risk factors found that Black race and ICS prescription had the  
335 strongest positive associations with asthma exacerbations, as determined by individual-level  
336 logistic regression and spatial GAM models. In our cohort of Penn Medicine asthma patients,  
337 66% with no exacerbations were Black compared to 83% with 5+ exacerbations, consistent with  
338 known racial disparities in asthma and observations in past Penn Medicine cohorts [44,45]. With  
339 regard to the observed association between exacerbations and ICS prescription, international  
340 asthma management guidelines underwent a major shift in 2019, recommending ICS as part of  
341 the first-line treatment for all asthma patients [46]. This shift was not reflected in our cohort,  
342 with only 76.0% of patients prescribed ICS. We observed exacerbations in patients in our cohort  
343 regardless of whether they had an ICS prescription, however, the strong association between ICS  
344 and exacerbations suggests that patients with more severe asthma were prescribed ICS more  
345 frequently than those with milder asthma. Our sensitivity analysis found that logistic regression  
346 identified positive associations between age 35-54 and NO<sub>2</sub> exposure that were not observed in a  
347 negative binomial regression model, suggesting that these factors were associated with risk of  
348 having at least one exacerbation compared to none, but not with having a higher count of  
349 exacerbations.

350 Our spatial analysis of patient-level data revealed several important insights. First, we  
351 observed that asthma exacerbation risk across Philadelphia was spatially correlated and  
352 identified a hotspot with 42% higher odds of exacerbation compared to the median across the  
353 study region. This finding is consistent with the results of community-based pediatric asthma  
354 screening in Philadelphia, which have found that local asthma prevalence can vary significantly



355 from regional or national estimates [47]. Our findings are also consistent with studies that have  
356 assessed spatial heterogeneity of pediatric and adult asthma data in other United States  
357 metropolitan areas, albeit with less granular spatial resolution. Zárate et al. observed statistically  
358 significant spatial patterning of asthma-related emergency department visits across census tracts  
359 in Central Texas [48], Grunwell et al. identified a group of contiguous census tracts in the State  
360 of Georgia with high rates of admission to the pediatric intensive care unit for asthma [49], and  
361 Harris et al. and Corburn et al. identified a statistically significant cluster of zip codes in St.  
362 Louis, Missouri and of census tracts in New York City, respectively, with elevated pediatric  
363 asthma hospitalization rates [50,51]. Our observation of a West and South Philadelphia hotspot  
364 of exacerbation risk is also consistent with analyses of past Penn Medicine cohorts [3,4] that  
365 focused on validating methods for augmenting EHR datasets rather than identifying factors  
366 associated with the hotspots.

367         The factors we found to be associated with asthma exacerbations according to EHR- and  
368 EHR & SEDH- adjusted spatial GAM models were largely consistent with individual-level  
369 logistic regression findings, but the spatial analysis provided an improved context to understand  
370 the individual-level results. Adjusting for all EHR and SEDH variables decreased the variance in  
371 spatial ORs by 67.2%, indicating that these variables together accounted for a large proportion of  
372 the spatial variance in exacerbation odds. By adjusting the spatial model one variable at a time,  
373 we found that ADI, race, and health insurance type most attenuated the hotspot area and effect  
374 size by reducing the variance of spatial ORs, suggesting that these variables were the most  
375 influential in determining the spatial distribution of exacerbation risk. Our findings are consistent  
376 with known asthma disparities by race/ethnicity and socioeconomic status [7–11], as well as past  
377 neighborhood-level analyses of pediatric asthma: Harris et al. and Corburn et al. found that

378 asthma hospitalization hotspots in St. Louis and New York City had greater proportions of non-  
379 White residents and greater rates of poverty, unemployment, high-density housing, and lack of  
380 access to a household vehicle, although they did not test for statistical significance [50,51].  
381 Grunwell et al. found a statistically significant difference between hotspot and non-hotspot  
382 census tracts in Georgia for poverty, unemployment, and high-density housing, but not for race  
383 [49].

384        Nearly all patient characteristics in our cohort, including health insurance type and ADI,  
385 differed significantly between Black and White patients (Table 4). Most notably, 8.5% of White  
386 patients had Medicaid health insurance compared to 38% of Black patients, and the median ADI  
387 for White patients was 2.60 (IQR 1.50-4.30) compared to 8.40 for Black patients (IQR 6.50-  
388 9.40), making it difficult to assess confounding in our spatial models. Although the VIF  
389 indicated that all variables could be included in a multivariable model without substantially  
390 inflating variance, collinearity between race and ADI as well as race and health insurance type  
391 (S4 Fig) may help explain why ADI and health insurance type were statistically significant in  
392 bivariable spatial models but not in the EHR & SEDH-adjusted spatial GAM nor in the EHR &  
393 SEDH-adjusted logistic regression (Tables 2 and 3). We attempted to overcome some of these  
394 limitations by stratifying our analysis by race. We found that, unlike in the full cohort, adjusting  
395 for ADI and health insurance type for Black patients did not attenuate the variance in spatial  
396 ORs, suggesting that in our cohort the association between these variables and asthma  
397 exacerbations was confounded by race. Our results are consistent with previous observations that  
398 racial disparities in asthma control persist even after accounting socioeconomic status [52], but  
399 that it is difficult to separate out the effects of socioeconomic status from the effects of race [53].  
400 Confounding of the asthma-socioeconomic status relationship by race has also been observed in

401 past neighborhood-level analyses of asthma morbidity. Zárate et al. found that spatial patterning  
402 of asthma-related emergency department visits in Central Texas was partially explained by  
403 socioeconomic characteristics in White patients, but not in Black or Hispanic patients [48]. More  
404 broadly, understanding the relative contributions of many social determinants of health to asthma  
405 is made difficult by their unequal distribution across racial/ethnic groups in the United States  
406 [10].

407 Our health insurance type variable serves as a proxy for individual-level socioeconomic  
408 status, and the relationship we measured between it and asthma exacerbation risk is potentially  
409 mediated by several pathways including increased rates of smoking [54], psychosocial stress  
410 [55], and obesity [56], or an unmeasured variable that varies with socioeconomic status and is  
411 also associated with minoritized racial and ethnicity groups in the United States [57]. On the  
412 other hand, low neighborhood-level socioeconomic status, which we measured with ADI, is  
413 associated with differential exposure to indoor and outdoor air pollution, psychosocial stress  
414 from neighborhood violence, and community norms surrounding health behaviors, all of which  
415 have been linked to asthma exacerbations [27]. Due to geographic segregation by race that  
416 resulted from structural racism and is common in many US cities, including in Philadelphia as  
417 we observed in our study, race and neighborhood-level SES are also highly correlated [58].  
418 Thus, our inability to identify an association between asthma exacerbations and ADI when  
419 restricting our analysis to Black patients may be due to a restriction of the range of people across  
420 the ADI spectrum relative to the range observed in all patients [48]. Future work is needed to  
421 understand what specific SEDH variables that covary with race, ADI, and health insurance type  
422 are the primary drivers of local disparities in asthma exacerbation risk across Philadelphia.

423 Our results demonstrate that integration of diverse SEDH datasets with the EHR and the  
424 use of both spatial and non-spatial modeling approaches are helpful to understand factors  
425 contributing to complex health conditions in real world populations. In both our logistic  
426 regression models and spatial GAMs, model fit was not improved by adjusting for SEDH  
427 variables in addition to EHR-derived variables. However, in our spatial models, adjusting for  
428 SEDH variables resulted in twice as much reduction of the initial variance in spatial ORs  
429 compared to adjusting for EHR variables only. Our non-spatial and spatial models also identified  
430 different sets of factors associated with exacerbations. For example, ICS prescription was found  
431 to have a strong positive association with exacerbations in logistic regression models but did not  
432 contribute to the spatial distribution of ORs; conversely, ADI attenuated the variance in spatial  
433 ORs more strongly than all other variables tested but was not significant in either logistic  
434 regression or negative binomial models. These findings present a framework for future efforts to  
435 expand the scope of EHR data, which, especially as the spatial resolution of SEDH datasets  
436 continues to increase, will allow for improved individualized exposure estimates. In the future,  
437 integration of SEDH data into the EHR may be helpful to tailor asthma management strategies  
438 and for health systems to create population-level interventions to improve health of their patients.

439 This study is strengthened by the high spatial resolution of both our SEDH data and our  
440 analysis. Integrating the highest resolution SEDH data available during the time of the study  
441 period allowed us to most closely approximate individual-level exposures, and analyzing EHR  
442 data at a fine resolution allowed us to understand local health patterns that may not be visible at  
443 the census tract or zip-code level. Additional strengths included accounting for many variables  
444 and increasing the likelihood that Penn Medicine was patients' primary care provider by  
445 applying SRR restriction. Our study is also subject to limitations, including some related to use

446 of EHR data, such as missingness, entry error, and phenotype misclassification. Additionally, the  
447 geocoded addresses used in our study reflect residence at the time of the data pull, but they do  
448 not account for residential mobility during the study period, nor does residence information  
449 provide a full assessment of environmental exposures.

450

## 451 **Conclusion**

452 By integrating seven datasets containing information on SEDH with an EHR dataset to create  
453 individualized exposure assessments, we identified non-spatial and spatial factors associated  
454 with asthma exacerbations. Race and prescription of an ICS were most strongly associated with  
455 exacerbations in individual-level models. Race also accounted for the most spatial variation in  
456 exacerbation odds, along with ADI and health insurance type. Because these three variables had  
457 similar spatial distributions, understanding which contributes most to disparities in asthma  
458 exacerbations requires additional study of people living in the region identified as a hotspot. Our  
459 findings demonstrate how integrating diverse data types and geospatial modeling approaches  
460 with EHR data are helpful to understand complex diseases locally.

461

## 462 **Acknowledgements**

463 We would like to thank Sunil Thomas from the University of Pennsylvania Penn Data Store for  
464 extracting the EHR data used for this project.

465 **Table 1. Patient characteristics by exacerbation count levels.** Shown are the characteristics of  
 466 patients according to their number of exacerbations during the study period. For each  
 467 exacerbation level, the number and percentage of patients are shown for categorical variables,  
 468 and the Median and Interquartile Range (IQR) are shown for continuous variables.  
 469

| Characteristic <sup>a</sup>         | Number of Exacerbations |                   |                   |                   | p-value <sup>b</sup> |
|-------------------------------------|-------------------------|-------------------|-------------------|-------------------|----------------------|
|                                     | 0<br>N = 4,327          | 1-2<br>N = 1,810  | 3-4<br>N = 328    | 5+<br>N = 191     |                      |
| <b>Years followed</b>               | 2.69 (1.89, 3.32)       | 2.81 (1.96, 3.46) | 3.12 (2.48, 3.64) | 3.60 (2.82, 3.84) | <10 <sup>-4</sup>    |
| <b>Age</b>                          |                         |                   |                   |                   | <10 <sup>-4</sup>    |
| 18-34                               | 1,498 (35%)             | 524 (29%)         | 82 (25%)          | 51 (27%)          |                      |
| 35-54                               | 1,445 (33%)             | 688 (38%)         | 144 (44%)         | 81 (42%)          |                      |
| 55-74                               | 1,198 (28%)             | 512 (28%)         | 87 (27%)          | 54 (28%)          |                      |
| 75+                                 | 186 (4.3%)              | 86 (4.8%)         | 15 (4.6%)         | 5 (2.6%)          |                      |
| <b>Sex</b>                          |                         |                   |                   |                   | 0.29                 |
| Male                                | 1,020 (24%)             | 397 (22%)         | 71 (22%)          | 51 (27%)          |                      |
| Female                              | 3,307 (76%)             | 1,413 (78%)       | 257 (78%)         | 140 (73%)         |                      |
| <b>Race</b>                         |                         |                   |                   |                   | <10 <sup>-4</sup>    |
| White                               | 1,059 (24%)             | 325 (18%)         | 52 (16%)          | 20 (10%)          |                      |
| Black                               | 2,860 (66%)             | 1,349 (75%)       | 260 (79%)         | 159 (83%)         |                      |
| Unknown/Other                       | 408 (9.4%)              | 136 (7.5%)        | 16 (4.9%)         | 12 (6.3%)         |                      |
| <b>Ethnicity</b>                    |                         |                   |                   |                   | 0.10                 |
| non-Hispanic/Latino                 | 4,160 (96%)             | 1,747 (97%)       | 322 (98%)         | 188 (98%)         |                      |
| Hispanic/Latino                     | 167 (3.9%)              | 63 (3.5%)         | 6 (1.8%)          | 3 (1.6%)          |                      |
| <b>BMI</b>                          |                         |                   |                   |                   | <10 <sup>-4</sup>    |
| Not Overweight or Obese             | 908 (21%)               | 307 (17%)         | 48 (15%)          | 30 (16%)          |                      |
| Overweight                          | 1,008 (23%)             | 426 (24%)         | 81 (25%)          | 38 (20%)          |                      |
| Class 1 Obesity                     | 970 (22%)               | 381 (21%)         | 64 (20%)          | 40 (21%)          |                      |
| Class 2 Obesity                     | 651 (15%)               | 300 (17%)         | 40 (12%)          | 40 (21%)          |                      |
| Class 3 Obesity                     | 790 (18%)               | 396 (22%)         | 95 (29%)          | 43 (23%)          |                      |
| <b>Health insurance type</b>        |                         |                   |                   |                   | <10 <sup>-4</sup>    |
| Private                             | 1,978 (46%)             | 736 (41%)         | 131 (40%)         | 49 (26%)          |                      |
| Medicaid                            | 1,270 (29%)             | 624 (34%)         | 113 (34%)         | 87 (46%)          |                      |
| Medicare                            | 1,079 (25%)             | 450 (25%)         | 84 (26%)          | 55 (29%)          |                      |
| <b>Smoking status</b>               |                         |                   |                   |                   | <10 <sup>-4</sup>    |
| Never Smoked                        | 2,533 (59%)             | 997 (55%)         | 167 (51%)         | 84 (44%)          |                      |
| Ever Smoker                         | 1,233 (28%)             | 517 (29%)         | 110 (34%)         | 77 (40%)          |                      |
| Current Smoker                      | 561 (13%)               | 296 (16%)         | 51 (16%)          | 30 (16%)          |                      |
| <b>COPD</b>                         | 398 (9.2%)              | 219 (12%)         | 44 (13%)          | 30 (16%)          | <10 <sup>-4</sup>    |
| <b>Allergic rhinitis</b>            | 1,478 (34%)             | 636 (35%)         | 133 (41%)         | 104 (54%)         | <10 <sup>-4</sup>    |
| <b>Elixhauser comorbidity score</b> |                         |                   |                   |                   | <10 <sup>-4</sup>    |
| <0                                  | 220 (5.1%)              | 85 (4.7%)         | 21 (6.4%)         | 5 (2.6%)          |                      |
| 0                                   | 3,035 (70%)             | 1,214 (67%)       | 193 (59%)         | 99 (52%)          |                      |
| 1-9                                 | 723 (17%)               | 356 (20%)         | 71 (22%)          | 60 (31%)          |                      |
| 10+                                 | 349 (8.1%)              | 155 (8.6%)        | 43 (13%)          | 27 (14%)          |                      |
| <b>ICS</b>                          | 3,074 (71%)             | 1,489 (82%)       | 309 (94%)         | 188 (98%)         | <10 <sup>-4</sup>    |
| <b>NO<sub>2</sub> exposure</b>      | 7.20 (6.86, 7.77)       | 7.18 (6.90, 7.70) | 7.24 (6.86, 7.79) | 7.14 (6.78, 7.56) | 0.35                 |
| <b>PM<sub>2.5</sub> exposure</b>    | 8.20 (7.84, 8.65)       | 8.16 (7.81, 8.62) | 8.22 (7.86, 8.62) | 8.14 (7.78, 8.58) | 0.018                |
| <b>Toxic releases exposure</b>      | 231 (5.3%)              | 87 (4.8%)         | 18 (5.5%)         | 10 (5.2%)         | 0.85                 |
| <b>Vehicular traffic exposure</b>   |                         |                   |                   |                   | 0.095                |

|                                               |                   |                   |                   |                   |                   |
|-----------------------------------------------|-------------------|-------------------|-------------------|-------------------|-------------------|
| Lowest                                        | 1,079 (25%)       | 447 (25%)         | 85 (26%)          | 53 (28%)          |                   |
| Low                                           | 1,079 (25%)       | 441 (24%)         | 96 (29%)          | 48 (25%)          |                   |
| High                                          | 1,046 (24%)       | 485 (27%)         | 80 (24%)          | 53 (28%)          |                   |
| Highest                                       | 1,123 (26%)       | 437 (24%)         | 67 (20%)          | 37 (19%)          |                   |
| <b>Area deprivation index</b>                 | 7.00 (3.50, 9.10) | 7.80 (4.30, 9.20) | 7.70 (5.30, 9.13) | 7.80 (5.25, 9.30) | <10 <sup>-4</sup> |
| <b>Housing violations</b>                     | 0.80 (0.36, 1.47) | 0.83 (0.39, 1.49) | 0.90 (0.45, 1.61) | 0.84 (0.38, 1.28) | 0.083             |
| <b>Normalized difference vegetation index</b> | 0.21 (0.17, 0.27) | 0.21 (0.17, 0.26) | 0.21 (0.16, 0.27) | 0.22 (0.19, 0.26) | 0.26              |

470 <sup>a</sup>Units are as follows: age (years), ICS (yes/no indicator of inhaled corticosteroid prescription), NO<sub>2</sub> (ppbv), PM2.5  
 471 (µg/m<sup>3</sup>), toxic releases exposure (yes/no indicator of exposure), area deprivation index (unitless index scaled by  
 472 dividing by 10), housing violations (housing violations per 100 people), normalized difference vegetation index  
 473 (unitless index ranging from -1 to 1). See Methods for more details.

474 <sup>b</sup>Kruskal-Wallis rank sum test; Pearson's Chi-squared test

475 **Table 2. Individual-level asthma exacerbation risk factors in multivariable logistic**  
 476 **regression models.** Shown are the adjusted odds ratios (ORs), 95% confidence intervals (CIs),  
 477 and p-values for logistic regression models of asthma exacerbations as a dichotomous outcome  
 478 adjusted for EHR-derived variables only and for both EHR and SEDH variables.  
 479

| Characteristic <sup>a</sup>         | EHR-adjusted |            |                      | EHR & SEDH-adjusted |            |                      |
|-------------------------------------|--------------|------------|----------------------|---------------------|------------|----------------------|
|                                     | OR           | 95% CI     | p-value              | OR                  | 95% CI     | p-value              |
| <b>Years followed</b>               | 1.16         | 1.09, 1.24 | <10 <sup>-4</sup>    | 1.17                | 1.09, 1.24 | <10 <sup>-4</sup>    |
| <b>Age</b>                          |              |            |                      |                     |            |                      |
| 18-34                               | —            | —          |                      | —                   | —          |                      |
| 35-54                               | 1.26         | 1.11, 1.44 | 5.7x10 <sup>-4</sup> | 1.27                | 1.11, 1.45 | 4.0x10 <sup>-4</sup> |
| 55-74                               | 1.08         | 0.91, 1.27 | 0.38                 | 1.09                | 0.92, 1.28 | 0.33                 |
| 75+                                 | 1.29         | 0.96, 1.73 | 0.095                | 1.33                | 0.98, 1.79 | 0.064                |
| <b>Sex</b>                          |              |            |                      |                     |            |                      |
| Male                                | —            | —          |                      | —                   | —          |                      |
| Female                              | 0.98         | 0.87, 1.12 | 0.79                 | 0.98                | 0.86, 1.11 | 0.77                 |
| <b>Race</b>                         |              |            |                      |                     |            |                      |
| White                               | —            | —          |                      | —                   | —          |                      |
| Black                               | 1.48         | 1.29, 1.72 | <10 <sup>-4</sup>    | 1.52                | 1.28, 1.81 | <10 <sup>-4</sup>    |
| Unknown/Other                       | 1.01         | 0.79, 1.28 | 0.95                 | 1.01                | 0.79, 1.29 | 0.94                 |
| <b>Ethnicity</b>                    |              |            |                      |                     |            |                      |
| Non-Hispanic/Latino                 | —            | —          |                      | —                   | —          |                      |
| Hispanic/Latino                     | 0.99         | 0.71, 1.36 | 0.94                 | 0.98                | 0.71, 1.35 | 0.91                 |
| <b>BMI</b>                          |              |            |                      |                     |            |                      |
| Not Overweight or Obese             | —            | —          |                      | —                   | —          |                      |
| Overweight                          | 1.15         | 0.98, 1.36 | 0.088                | 1.16                | 0.98, 1.37 | 0.079                |
| Class 1 Obesity                     | 0.99         | 0.83, 1.17 | 0.87                 | 1.00                | 0.84, 1.18 | 0.97                 |
| Class 2 Obesity                     | 1.09         | 0.91, 1.31 | 0.36                 | 1.09                | 0.91, 1.32 | 0.35                 |
| Class 3 Obesity                     | 1.24         | 1.04, 1.48 | 0.017                | 1.25                | 1.04, 1.49 | 0.015                |
| <b>Health insurance type</b>        |              |            |                      |                     |            |                      |
| Private                             | —            | —          |                      | —                   | —          |                      |
| Medicaid                            | 1.22         | 1.07, 1.39 | 0.0036               | 1.19                | 1.04, 1.36 | 0.013                |
| Medicare                            | 0.91         | 0.77, 1.06 | 0.23                 | 0.89                | 0.76, 1.05 | 0.17                 |
| <b>Smoking status</b>               |              |            |                      |                     |            |                      |
| Never Smoked                        | —            | —          |                      | —                   | —          |                      |
| Ever Smoker                         | 1.04         | 0.92, 1.18 | 0.52                 | 1.04                | 0.92, 1.18 | 0.56                 |
| Current Smoker                      | 1.17         | 1.0, 1.37  | 0.057                | 1.16                | 0.98, 1.36 | 0.075                |
| <b>COPD</b>                         |              |            |                      |                     |            |                      |
| No                                  | —            | —          |                      | —                   | —          |                      |
| Yes                                 | 1.14         | 0.95, 1.36 | 0.17                 | 1.11                | 0.93, 1.34 | 0.24                 |
| <b>Allergic rhinitis</b>            |              |            |                      |                     |            |                      |
| No                                  | —            | —          |                      | —                   | —          |                      |
| Yes                                 | 1.09         | 0.97, 1.22 | 0.13                 | 1.09                | 0.98, 1.22 | 0.11                 |
| <b>Elixhauser comorbidity score</b> |              |            |                      |                     |            |                      |
| <0                                  | —            | —          |                      | —                   | —          |                      |
| 0                                   | 1.20         | 0.94, 1.54 | 0.14                 | 1.20                | 0.94, 1.54 | 0.14                 |
| 1-9                                 | 1.40         | 1.08, 1.83 | 0.012                | 1.39                | 1.07, 1.82 | 0.015                |
| 10+                                 | 1.20         | 0.89, 1.62 | 0.22                 | 1.19                | 0.89, 1.61 | 0.25                 |
| <b>ICS</b>                          |              |            |                      |                     |            |                      |
| No                                  | —            | —          |                      | —                   | —          |                      |
| Yes                                 | 2.19         | 1.91, 2.51 | <10 <sup>-4</sup>    | 2.20                | 1.92, 2.52 | <10 <sup>-4</sup>    |
| <b>NO<sub>2</sub> exposure</b>      |              |            |                      | 1.28                | 1.07, 1.52 | 0.0058               |
| <b>PM<sub>2.5</sub> exposure</b>    |              |            |                      | 0.89                | 0.72, 1.09 | 0.25                 |



|                                               |       |  |  |       |            |      |
|-----------------------------------------------|-------|--|--|-------|------------|------|
| <b>Toxic releases exposure</b>                |       |  |  |       |            |      |
| No                                            |       |  |  | —     | —          |      |
| Yes                                           |       |  |  | 1.07  | 0.83, 1.37 | 0.60 |
| <b>Vehicular traffic exposure</b>             |       |  |  |       |            |      |
| Lowest                                        |       |  |  | —     | —          |      |
| Low                                           |       |  |  | 1.01  | 0.88, 1.17 | 0.86 |
| High                                          |       |  |  | 1.10  | 0.95, 1.28 | 0.18 |
| Highest                                       |       |  |  | 0.95  | 0.82, 1.11 | 0.54 |
| <b>Area deprivation index</b>                 |       |  |  | 1.02  | 0.99, 1.04 | 0.22 |
| <b>Housing violations</b>                     |       |  |  | 0.96  | 0.90, 1.01 | 0.11 |
| <b>Normalized difference vegetation index</b> |       |  |  | 1.08  | 0.47, 2.44 | 0.86 |
| <b>AIC</b>                                    | 8,323 |  |  | 8,322 |            |      |

480 <sup>a</sup>Units are as follows: age (years), ICS (yes/no indicator of inhaled corticosteroid prescription), NO<sub>2</sub> (ppbv), PM2.5  
481 (µg/m<sup>3</sup>), toxic releases exposure (yes/no indicator of exposure), area deprivation index (unitless index scaled by  
482 dividing by 10), housing violations (housing violations per 100 people), normalized difference vegetation index  
483 (unitless index ranging from -1 to 1). See Methods for more details.

484 **Table 3. Spatial asthma exacerbation risk factors in multivariable spatial GAMs.** Shown are  
 485 the adjusted odds ratios (ORs), 95% confidence intervals (CIs), and p-values for spatial GAMs of  
 486 asthma exacerbations as a dichotomous outcome adjusted for EHR-derived variables only and  
 487 for both EHR-derived and SEDH variables.  
 488

| Characteristic <sup>a</sup>         | EHR-adjusted |            |                      | EHR & SEDH-adjusted |            |                      |
|-------------------------------------|--------------|------------|----------------------|---------------------|------------|----------------------|
|                                     | OR           | 95% CI     | p-value              | OR                  | 95% CI     | p-value              |
| <b>Years followed</b>               | 1.17         | 1.10, 1.25 | <10 <sup>-4</sup>    | 1.17                | 1.09, 1.25 | <10 <sup>-4</sup>    |
| <b>Age</b>                          |              |            |                      |                     |            |                      |
| 18-34                               | —            | —          | —                    | —                   | —          | —                    |
| 35-54                               | 1.27         | 1.11, 1.45 | 3.7x10 <sup>-4</sup> | 1.27                | 1.11, 1.45 | 3.9x10 <sup>-4</sup> |
| 55-74                               | 1.07         | 0.91, 1.26 | 0.42                 | 1.07                | 0.91, 1.27 | 0.41                 |
| 75+                                 | 1.30         | 0.97, 1.75 | 0.083                | 1.31                | 0.97, 1.77 | 0.075                |
| <b>Sex</b>                          |              |            |                      |                     |            |                      |
| Male                                | —            | —          | —                    | —                   | —          | —                    |
| Female                              | 0.99         | 0.87, 1.12 | 0.82                 | 0.98                | 0.87, 1.12 | 0.81                 |
| <b>Race</b>                         |              |            |                      |                     |            |                      |
| White                               | —            | —          | —                    | —                   | —          | —                    |
| Black                               | 1.58         | 1.35, 1.84 | <10 <sup>-4</sup>    | 1.55                | 1.30, 1.84 | <10 <sup>-4</sup>    |
| Unknown/Other                       | 1.03         | 0.81, 1.31 | 0.82                 | 1.01                | 0.79, 1.30 | 0.91                 |
| <b>Ethnicity</b>                    |              |            |                      |                     |            |                      |
| non-Hispanic/Latino                 | —            | —          | —                    | —                   | —          | —                    |
| Hispanic/Latino                     | 1.03         | 0.74, 1.42 | 0.88                 | 1.02                | 0.73, 1.41 | 0.92                 |
| <b>BMI</b>                          |              |            |                      |                     |            |                      |
| Not Overweight or Obese             | —            | —          | —                    | —                   | —          | —                    |
| Overweight                          | 1.17         | 0.99, 1.37 | 0.065                | 1.16                | 0.99, 1.37 | 0.070                |
| Class 1 Obesity                     | 1.00         | 0.84, 1.18 | 0.99                 | 1.00                | 0.84, 1.18 | 0.98                 |
| Class 2 Obesity                     | 1.10         | 0.91, 1.32 | 0.34                 | 1.09                | 0.91, 1.32 | 0.36                 |
| Class 3 Obesity                     | 1.25         | 1.05, 1.50 | 0.012                | 1.25                | 1.05, 1.49 | 0.013                |
| <b>Health insurance type</b>        |              |            |                      |                     |            |                      |
| Private                             | —            | —          | —                    | —                   | —          | —                    |
| Medicaid                            | 1.18         | 1.03, 1.34 | 0.015                | 1.18                | 1.03, 1.34 | 0.019                |
| Medicare                            | 0.90         | 0.76, 1.05 | 0.17                 | 0.89                | 0.76, 1.05 | 0.17                 |
| <b>Smoking status</b>               |              |            |                      |                     |            |                      |
| Never Smoked                        | —            | —          | —                    | —                   | —          | —                    |
| Ever Smoker                         | 1.04         | 0.91, 1.17 | 0.58                 | 1.03                | 0.91, 1.17 | 0.60                 |
| Current Smoker                      | 1.15         | 0.98, 1.35 | 0.092                | 1.15                | 0.98, 1.35 | 0.093                |
| <b>COPD</b>                         |              |            |                      |                     |            |                      |
| No                                  | —            | —          | —                    | —                   | —          | —                    |
| Yes                                 | 1.10         | 0.92, 1.32 | 0.30                 | 1.10                | 0.92, 1.32 | 0.29                 |
| <b>Allergic rhinitis</b>            |              |            |                      |                     |            |                      |
| No                                  | —            | —          | —                    | —                   | —          | —                    |
| Yes                                 | 1.09         | 0.98, 1.22 | 0.12                 | 1.10                | 0.98, 1.22 | 0.11                 |
| <b>Elixhauser comorbidity score</b> |              |            |                      |                     |            |                      |
| <0                                  | —            | —          | —                    | —                   | —          | —                    |
| 0                                   | 1.20         | 0.94, 1.54 | 0.14                 | 1.20                | 0.94, 1.53 | 0.15                 |
| 1-9                                 | 1.39         | 1.06, 1.81 | 0.016                | 1.38                | 1.06, 1.80 | 0.018                |
| 10+                                 | 1.18         | 0.87, 1.59 | 0.28                 | 1.17                | 0.87, 1.58 | 0.29                 |
| <b>ICS</b>                          |              |            |                      |                     |            |                      |
| No                                  | —            | —          | —                    | —                   | —          | —                    |
| Yes                                 | 2.22         | 1.93, 2.54 | <10 <sup>-4</sup>    | 2.21                | 1.93, 2.54 | <10 <sup>-4</sup>    |
| <b>NO<sub>2</sub> exposure</b>      |              |            |                      | 1.09                | 0.82, 1.44 | 0.56                 |
| <b>PM<sub>2.5</sub> exposure</b>    |              |            |                      | 1.08                | 0.81, 1.45 | 0.59                 |

|                                               |       |  |  |       |            |      |
|-----------------------------------------------|-------|--|--|-------|------------|------|
| <b>Toxic releases exposure</b>                |       |  |  |       |            |      |
| No                                            |       |  |  | —     | —          | —    |
| Yes                                           |       |  |  | 1.06  | 0.82, 1.37 | 0.65 |
| <b>Vehicular traffic exposure</b>             |       |  |  |       |            |      |
| Lowest                                        |       |  |  | —     | —          | —    |
| Low                                           |       |  |  | 1.02  | 0.88, 1.19 | 0.76 |
| High                                          |       |  |  | 1.10  | 0.95, 1.27 | 0.21 |
| Highest                                       |       |  |  | 0.97  | 0.83, 1.13 | 0.66 |
| <b>Area deprivation index</b>                 |       |  |  | 1.01  | 0.99, 1.04 | 0.32 |
| <b>Housing violations</b>                     |       |  |  | 0.97  | 0.91, 1.02 | 0.23 |
| <b>Normalized difference vegetation index</b> |       |  |  | 0.99  | 0.43, 2.27 | 0.97 |
| <b>AIC<sup>b</sup></b>                        | 8,296 |  |  | 8,309 |            |      |

489 <sup>a</sup>Units are as follows: age (years), ICS (yes/no indicator of inhaled corticosteroid prescription), NO<sub>2</sub> (ppbv), PM2.5  
 490 (µg/m<sup>3</sup>), toxic releases exposure (yes/no indicator of exposure), area deprivation index (unitless index scaled by  
 491 dividing by 10), housing violations (housing violations per 100 people), normalized difference vegetation index  
 492 (unitless index ranging from -1 to 1). See Methods for more details.

493 <sup>b</sup>The AIC of the unadjusted model was 8,576.

494 **Table 4. Patient characteristics by race.** Shown are the number and percentage of patients in  
 495 each level for categorical variables, and the Median and Interquartile Range (IQR) for  
 496 continuous variables in patients of White race versus Black race.  
 497

| Characteristic <sup>a</sup>         | Race               |                    | p-value <sup>b</sup> |
|-------------------------------------|--------------------|--------------------|----------------------|
|                                     | White<br>N = 1,456 | Black<br>N = 4,628 |                      |
| <b>Exacerbation count</b>           |                    |                    | <10 <sup>-4</sup>    |
| 0                                   | 1,059 (73%)        | 2,860 (62%)        |                      |
| 1-2                                 | 325 (22%)          | 1,349 (29%)        |                      |
| 3-4                                 | 52 (3.6%)          | 260 (5.6%)         |                      |
| 5+                                  | 20 (1.4%)          | 159 (3.4%)         |                      |
| <b>Years followed</b>               | 2.62 (1.86, 3.28)  | 2.82 (1.98, 3.46)  | <10 <sup>-4</sup>    |
| <b>Age</b>                          |                    |                    | <10 <sup>-4</sup>    |
| 18-34                               | 468 (32%)          | 1,458 (32%)        |                      |
| 35-54                               | 481 (33%)          | 1,667 (36%)        |                      |
| 55-74                               | 407 (28%)          | 1,332 (29%)        |                      |
| 75+                                 | 100 (6.9%)         | 171 (3.7%)         |                      |
| <b>Sex</b>                          |                    |                    | <10 <sup>-4</sup>    |
| Male                                | 473 (32%)          | 905 (20%)          |                      |
| Female                              | 983 (68%)          | 3,723 (80%)        |                      |
| <b>Ethnicity</b>                    |                    |                    | 0.0024               |
| non-Hispanic/Latino                 | 1,431 (98%)        | 4,591 (99%)        |                      |
| Hispanic/Latino                     | 25 (1.7%)          | 37 (0.8%)          |                      |
| <b>BMI</b>                          |                    |                    | <10 <sup>-4</sup>    |
| Not Overweight or Obese             | 521 (36%)          | 636 (14%)          |                      |
| Overweight                          | 462 (32%)          | 935 (20%)          |                      |
| Class 1 Obesity                     | 264 (18%)          | 1,048 (23%)        |                      |
| Class 2 Obesity                     | 106 (7.3%)         | 862 (19%)          |                      |
| Class 3 Obesity                     | 103 (7.1%)         | 1,147 (25%)        |                      |
| <b>Health insurance type</b>        |                    |                    | <10 <sup>-4</sup>    |
| Private                             | 981 (67%)          | 1,624 (35%)        |                      |
| Medicaid                            | 124 (8.5%)         | 1,781 (38%)        |                      |
| Medicare                            | 351 (24%)          | 1,223 (26%)        |                      |
| <b>Smoking status</b>               |                    |                    | <10 <sup>-4</sup>    |
| Never Smoked                        | 898 (62%)          | 2,519 (54%)        |                      |
| Ever Smoker                         | 463 (32%)          | 1,328 (29%)        |                      |
| Current Smoker                      | 95 (6.5%)          | 781 (17%)          |                      |
| <b>COPD</b>                         | 115 (7.9%)         | 536 (12%)          | <10 <sup>-4</sup>    |
| <b>Allergic rhinitis</b>            | 571 (39%)          | 1,541 (33%)        | <10 <sup>-4</sup>    |
| <b>Elixhauser comorbidity score</b> |                    |                    | <10 <sup>-4</sup>    |
| <0                                  | 32 (2.2%)          | 262 (5.7%)         |                      |
| 0                                   | 1,117 (77%)        | 2,986 (65%)        |                      |
| 1-9                                 | 222 (15%)          | 924 (20%)          |                      |
| 10+                                 | 85 (5.8%)          | 456 (9.9%)         |                      |
| <b>ICS</b>                          | 1,105 (76%)        | 3,510 (76%)        | 0.97                 |
| <b>NO<sub>2</sub> exposure</b>      | 7.85 (7.40, 8.18)  | 7.10 (6.81, 7.39)  | <10 <sup>-4</sup>    |
| <b>PM<sub>2.5</sub> exposure</b>    | 8.72 (8.28, 8.90)  | 8.05 (7.77, 8.41)  | <10 <sup>-4</sup>    |
| <b>Toxic releases exposure</b>      | 115 (7.9%)         | 194 (4.2%)         | <10 <sup>-4</sup>    |
| <b>Vehicular traffic exposure</b>   |                    |                    | <10 <sup>-4</sup>    |
| Lowest                              | 279 (19%)          | 1,283 (28%)        |                      |
| Low                                 | 267 (18%)          | 1,244 (27%)        |                      |
| High                                | 312 (21%)          | 1,177 (25%)        |                      |

|                                               |                   |                   |                   |
|-----------------------------------------------|-------------------|-------------------|-------------------|
| Highest                                       | 598 (41%)         | 924 (20%)         |                   |
| <b>Area deprivation index</b>                 | 2.60 (1.50, 4.30) | 8.40 (6.50, 9.40) | <10 <sup>-4</sup> |
| <b>Housing violations</b>                     | 0.41 (0.15, 0.74) | 0.99 (0.52, 1.68) | <10 <sup>-4</sup> |
| <b>Normalized difference vegetation index</b> | 0.18 (0.13, 0.25) | 0.22 (0.18, 0.27) | <10 <sup>-4</sup> |

498 <sup>a</sup>Units are as follows: age (years), ICS (yes/no indicator of inhaled corticosteroid prescription), NO<sub>2</sub> (ppbv), PM2.5  
 499 (µg/m<sup>3</sup>), toxic releases exposure (yes/no indicator of exposure), area deprivation index (unitless index scaled by  
 500 dividing by 10), housing violations (housing violations per 100 people), normalized difference vegetation index  
 501 (unitless index ranging from -1 to 1). See Methods for more details.

502 <sup>b</sup>Pearson's Chi-squared test; Wilcoxon rank sum test

503 **Figure Legends**

504 **Figure 1. Overview of study design.** Graphical overview of study design, including processing  
505 and linkage of electronic health record (EHR) and social and environmental determinants of  
506 health (SEDH) data, cohort selection including spatial filtering by assessing the representation of  
507 the EHR cohort compared to the underlying population, and patient-level and geospatial analyses  
508 on the expanded EHR dataset.

509 **Figure 2. Spatial odds ratios (ORs) of exacerbations before and after adjusting for EHR-**  
510 **derived and SEDH variables.** (A) Unadjusted spatial GAM (adjusted only for years followed).  
511 (B) Spatial GAM adjusted for EHR-derived variables only. (C) Spatial GAM adjusted for both  
512 EHR-derived and SEDH variables. Base maps were created using the Stamen Design from  
513 Stadia Maps.

514 **Figure 3. Spatial distribution of individual variables that most strongly attenuated the**  
515 **spatial odds ratios (ORs) of exacerbations along with corresponding spatial GAM results**  
516 **adjusted for these individual variables.** Spatial distribution in the study region of (A) the area  
517 deprivation index (ADI), (B) race, and (C) health insurance type of patients. Corresponding  
518 spatial GAMs adjusted only for years followed and (D) ADI, (E) race, or (F) health insurance  
519 type.

520 **Figure 4. Spatial odds ratios (ORs) of exacerbations among Black patients along with the**  
521 **effects of ADI and health insurance type on this distribution.** (A) SRR values for the updated  
522 study region used in spatial GAMs for patients of Black race only (SRR = 1 indicates no  
523 representativeness bias). (B) Unadjusted spatial GAM (adjusted only for years followed) for  
524 patients of Black race (N = 4,363). Spatial GAMs adjusted additionally for (C) area deprivation

525 index (ADI) and (D) health insurance type. Base maps were created using the Stamen Design  
526 from Stadia Maps.

527 **References**

528

529 1. Mooney SJ, Westreich DJ, El-Sayed AM. Commentary: Epidemiology in the era of big data.  
530 *Epidemiology*. 2015;c: 390–394. doi:10.1097/EDE.0000000000000274

531 2. Cook LA, Sachs J, Weiskopf NG. The quality of social determinants data in the electronic  
532 health record: a systematic review. *J Am Med Inform Assoc JAMIA*. 2021;29: 187–196.  
533 doi:10.1093/jamia/ocab199

534 3. Xie S, Greenblatt R, Levy MZ, Himes BE. Enhancing Electronic Health Record Data with  
535 Geospatial Information. *AMIA Summits Transl Sci Proc*. 2017;2017: 123–132.

536 4. Xie S, Himes BE. Approaches to link geospatially varying social, economic, and  
537 environmental factors with electronic health record data to better understand asthma  
538 exacerbations. *AMIA Annu Symp Proc*. 2018;2018: 1561–1570.

539 5. Cui Y, Eccles KM, Kwok RK, Joubert BR, Messier KP, Balshaw DM. Integrating multiscale  
540 geospatial environmental data into large population health studies: challenges and  
541 opportunities. *Toxics*. 2022;10: 403. doi:10.3390/toxics10070403

542 6. Schreibman A, Xie S, Hubbard RA, Himes BE. Linking ambient NO<sub>2</sub> pollution measures  
543 with electronic health record data to study asthma exacerbations. *AMIA Summits Transl  
544 Sci Proc*. 2023;2023: 467–476.

545 7. CDC. Asthma: most recent national asthma data. Atlanta, GA: US Department of Health and  
546 Human Services, CDC; 2020. Available:  
547 [https://www.cdc.gov/asthma/most\\_recent\\_national\\_asthma\\_data.htm](https://www.cdc.gov/asthma/most_recent_national_asthma_data.htm)

548 8. Leong AB, Ramsey CD, Celedón JC. The challenge of asthma in minority populations. *Clin  
549 Rev Allergy Immunol*. 2012;43: 156–183. doi:10.1007/s12016-011-8263-1

550 9. Forno E, Celedón JC. Health disparities in asthma. *Am J Respir Crit Care Med*. 2012;185:  
551 1033–1035. doi:10.1164/rccm.201202-0350ED

552 10. Grant T, Croce E, Matsui EC. Asthma and the social determinants of health. *Ann Allergy  
553 Asthma Immunol Off Publ Am Coll Allergy Asthma Immunol*. 2022;128: 5–11.  
554 doi:10.1016/j.anai.2021.10.002

555 11. Lovinsky-Desir S, Riley IL, Bryant-Stephens T, De Keyser H, Forno E, Kozik AJ, et al.  
556 Research priorities in pediatric asthma morbidity: addressing the impacts of systemic  
557 racism on children with asthma in the United States: an official American Thoracic Society  
558 workshop report. *Ann Am Thorac Soc*. 2024;21: 1349–1364.  
559 doi:10.1513/AnnalsATS.202407-767ST

560 12. Global Initiative for Asthma (GINA). Global strategy for asthma management and  
561 prevention (2024 update). Bethesda, MD: Global Initiative for Asthma (GINA); 2024.



- 562 13. Fuhlbrigge A, Peden D, Apter AJ, Boushey HA, Camargo CA, Gern J, et al. Asthma  
563 outcomes: exacerbations. *J Allergy Clin Immunol.* 2012;129: S34–S48.  
564 doi:10.1016/j.jaci.2011.12.983
- 565 14. Krishnan V, Diette GB, Rand CS, Bilderback AL, Merriman B, Hansel NN, et al. Mortality  
566 in patients hospitalized for asthma exacerbations in the United States. *Am J Respir Crit*  
567 *Care Med.* 2006;174: 633–638. doi:10.1164/rccm.200601-007OC
- 568 15. Ivanova JI, Bergman R, Birnbaum HG, Colice GL, Silverman RA, McLaurin K. Effect of  
569 asthma exacerbations on health care costs among asthmatic patients with moderate and  
570 severe persistent asthma. *J Allergy Clin Immunol.* 2012;129: 1229–1235.  
571 doi:10.1016/j.jaci.2012.01.039
- 572 16. Schatz M, Clark S, Camargo CA. Sex differences in the presentation and course of asthma  
573 hospitalizations. *Chest.* 2006;129: 50–55. doi:10.1378/chest.129.1.50
- 574 17. Schatz M, Mosen DM, Kosinski M, Vollmer WM, Magid DJ, O'Connor E, et al. Predictors  
575 of asthma control in a random sample of asthmatic patients. *J Asthma.* 2007;44: 341–345.  
576 doi:10.1080/02770900701344421
- 577 18. Pedersen SE, Bateman ED, Bousquet J, Busse WW, Yoxall S, Clark TJ. Determinants of  
578 response to fluticasone propionate and salmeterol/fluticasone propionate combination in the  
579 Gaining Optimal Asthma control study. *J Allergy Clin Immunol.* 2007;120: 1036–1042.  
580 doi:10.1016/j.jaci.2007.07.016
- 581 19. Price D, Zhang Q, Kocevar VS, Yin DD, Thomas M. Effect of a concomitant diagnosis of  
582 allergic rhinitis on asthma-related health care use by adults. *Clin Exp Allergy.* 2005;35:  
583 282–287. doi:10.1111/j.1365-2222.2005.02182.x
- 584 20. Miller MK, Lee JH, Miller DP, Wenzel SE. Recent asthma exacerbations: A key predictor of  
585 future exacerbations. *Respir Med.* 2007;101: 481–489. doi:10.1016/j.rmed.2006.07.005
- 586 21. Guarnieri M, Balmes JR. Outdoor air pollution and asthma. *The Lancet.* 2014;383: 1581–  
587 1592. doi:10.1016/S0140-6736(14)60617-6
- 588 22. Weitzman M, Gortmaker S, Sobol A. Racial, social, and environmental risks for childhood  
589 asthma. *Am J Dis Child.* 1990;144: 1189–1194.  
590 doi:10.1001/archpedi.1990.02150350021016
- 591 23. Black PN, Udy AA, Brodie SM. Sensitivity to fungal allergens is a risk factor for life-  
592 threatening asthma. *Allergy.* 2000;55: 501–504. doi:10.1034/j.1398-9995.2000.00293.x
- 593 24. Gelber LE, Seltzer LH, Bouzoukis JK, Pollart SM, Chapman MD, Platts-Mills TAE.  
594 Sensitization and exposure to indoor allergens as risk factors for asthma among patients  
595 presenting to hospital. *Am Rev Respir Dis.* 1993;147: 573–578.  
596 doi:10.1164/ajrccm/147.3.573

- 597 25. Lovasi GS, O’Neil-Dunne JPM, Lu JWT, Sheehan D, Perzanowski MS, MacFaden SW, et  
598 al. Urban tree canopy and asthma, wheeze, rhinitis, and allergic sensitization to tree pollen  
599 in a New York City birth cohort. *Environ Health Perspect.* 2013;121: 494–500.  
600 doi:10.1289/ehp.1205513
- 601 26. Lovasi GS, Quinn JW, Neckerman KM, Perzanowski MS, Rundle A. Children living in areas  
602 with more street trees have lower prevalence of asthma. *J Epidemiol Community Health.*  
603 2008;62: 647–649. doi:10.1136/jech.2007.071894
- 604 27. Gold DR, Wright R. Population disparities in asthma. *Annu Rev Public Health.* 2005;26: 89–  
605 113. doi:10.1146/annurev.publhealth.26.021304.144528
- 606 28. Fecho K, Ahalt SC, Appold S, Arunachalam S, Pfaff E, Stillwell L, et al. Development and  
607 application of an open tool for sharing and analyzing integrated clinical and environmental  
608 exposures data: asthma use case. *JMIR Form Res.* 2022;6: e32357. doi:10.2196/32357
- 609 29. Beck AF, Huang B, Ryan PH, Sandel MT, Chen C, Kahn RS. Areas with high rates of  
610 police-reported violent crime have higher rates of childhood asthma morbidity. *J Pediatr.*  
611 2016;173: 175-182.e1. doi:10.1016/j.jpeds.2016.02.018
- 612 30. Rasmussen SG, Ogburn EL, McCormack M, Casey JA, Bandeen-Roche K, Mercer DG, et al.  
613 Association between unconventional natural gas development in the Marcellus Shale and  
614 asthma exacerbations. *JAMA Intern Med.* 2016;176: 1334–1343.  
615 doi:10.1001/jamainternmed.2016.2436
- 616 31. van Walraven C, Austin PC, Jennings A, Quan H, Forster AJ. A modification of the  
617 Elixhauser comorbidity measures into a point system for hospital death using administrative  
618 data. *Med Care.* 2009;47: 626. doi:10.1097/MLR.0b013e31819432e5
- 619 32. Christie C, Xie S, Diwadkar AR, Greenblatt RE, Rizaldi A, Himes BE. Consolidated  
620 Environmental and Social Data Facilitates Neighborhood-Level Health Studies in  
621 Philadelphia. *AMIA Annu Symp Proc.* 2022;2021: 305–313.
- 622 33. Cooper MJ, Martin RV, McLinden CA, Brook JR. Inferring ground-level nitrogen dioxide  
623 concentrations at fine spatial resolution applied to the TROPOMI satellite instrument.  
624 *Environ Res Lett.* 2020;15: 104013. doi:10.1088/1748-9326/aba3a5
- 625 34. van Donkelaar A, Hammer MS, Bindle L, Brauer M, Brook JR, Garay MJ, et al. Monthly  
626 global estimates of fine particulate matter and their uncertainty. *Environ Sci Technol.*  
627 2021;55: 15287–15300. doi:10.1021/acs.est.1c05309
- 628 35. US EPA. TRI basic data files: calendar years 1987-present. 3 Mar 2013 [cited 25 Jul 2023].  
629 Available: [https://www.epa.gov/toxics-release-inventory-tri-program/tri-basic-data-files-](https://www.epa.gov/toxics-release-inventory-tri-program/tri-basic-data-files-calendar-years-1987-present)  
630 [calendar-years-1987-present](https://www.epa.gov/toxics-release-inventory-tri-program/tri-basic-data-files-calendar-years-1987-present)
- 631 36. RMSTRAFFIC (Traffic Volumes). 2023 [cited 25 Jul 2023]. Available: [https://data-](https://data-pennshare.opendata.arcgis.com/datasets/rmstraffic-traffic-volumes/explore)  
632 [pennshare.opendata.arcgis.com/datasets/rmstraffic-traffic-volumes/explore](https://data-pennshare.opendata.arcgis.com/datasets/rmstraffic-traffic-volumes/explore)

- 633 37. Kind AJH, Buckingham WR. Making neighborhood-disadvantage metrics accessible — the  
634 neighborhood atlas. *N Engl J Med*. 2018;378: 2456–2458. doi:10.1056/NEJMp1802313
- 635 38. University of Wisconsin School of Medicine Public Health. 2018 Area Deprivation Index  
636 v3.1. Available: <https://www.neighborhoodatlas.medicine.wisc.edu/>. Accessed July 2022.
- 637 39. Licenses and Inspections code violations. In: OpenDataPhilly [Internet]. [cited 25 Jul 2023].  
638 Available: <https://opendataphilly.org/datasets/licenses-and-inspections-code-violations/>
- 639 40. Ermida SL, Soares P, Mantas V, Göttische F-M, Trigo IF. Google Earth Engine open-source  
640 code for land surface temperature estimation from the Landsat series. *Remote Sens*.  
641 2020;12: 1471. doi:10.3390/rs12091471
- 642 41. R Core Team (2020). R: a language and environment for statistical computing. Vienna,  
643 Austria: R Foundation for Statistical Computing; Available: <https://www.R-project.org/>
- 644 42. Xie SJ, Kapos FP, Mooney SJ, Mooney S, Stephens KA, Chen C, et al. Geospatial divide in  
645 real-world EHR data: analytical workflow to assess regional biases and potential impact on  
646 health equity. *AMIA Summits Transl Sci Proc*. 2023;2023: 572–581.
- 647 43. Bai L, Bartell S, Bliss R, Vieira V. Mapping smoothed effect estimates from individual-level  
648 spatial data. 2022. Available: [https://search.r-](https://search.r-project.org/CRAN/refmans/MapGAM/html/MapGAM-package.html)  
649 [project.org/CRAN/refmans/MapGAM/html/MapGAM-package.html](https://search.r-project.org/CRAN/refmans/MapGAM/html/MapGAM-package.html)
- 650 44. Moorman JE, Akinbami LJ, Bailey CM, Zahran HS, King ME, Johnson CA, et al. National  
651 surveillance of asthma: United States, 2001-2010. *Vital Health Stat 3*. 2012; 1–58.
- 652 45. Greenblatt RE, Zhao EJ, Henrickson SE, Apter AJ, Hubbard RA, Himes BE. Factors  
653 associated with exacerbations among adults with asthma according to electronic health  
654 record data. *Asthma Res Pract*. 2019;5: 1. doi:10.1186/s40733-019-0048-y
- 655 46. Global Initiative for Asthma (GINA). Global strategy for asthma management and  
656 prevention (2019 update). Bethesda, MD: Global Initiative for Asthma (GINA); 2019.
- 657 47. Bryant-Stephens T, West C, Dirl C, Banks T, Briggs V, Rosenthal M. Asthma prevalence in  
658 philadelphia: description of two community-based methodologies to assess asthma  
659 prevalence in an inner-city population. *J Asthma*. 2012;49: 581–585.  
660 doi:10.3109/02770903.2012.690476
- 661 48. Zárata RebeccaA, Bhavnani D, Chambliss S, Hall EM, Zigler C, Cubbin C, et al.  
662 Neighborhood-level variability in asthma-related emergency department visits in Central  
663 Texas. *J Allergy Clin Immunol*. 2024;154: 933–939. doi:10.1016/j.jaci.2024.05.024
- 664 49. Grunwell JR, Opolka C, Mason C, Fitzpatrick AM. Geospatial analysis of social  
665 determinants of health identifies neighborhood hot spots associated with pediatric intensive  
666 care use for life-threatening asthma. *J Allergy Clin Immunol Pract*. 2022;10: 981-991.e1.  
667 doi:10.1016/j.jaip.2021.10.065

- 668 50. Harris KM. Mapping inequality: Childhood asthma and environmental injustice, a case study  
669 of St. Louis, Missouri. *Soc Sci Med.* 2019;230: 91–110.  
670 doi:10.1016/j.socscimed.2019.03.040
- 671 51. Corburn J, Osleeb J, Porter M. Urban asthma and the neighbourhood environment in New  
672 York City. *Health Place.* 2006;12: 167–179. doi:10.1016/j.healthplace.2004.11.002
- 673 52. Haselkorn T, Lee JH, Mink DR, Weiss ST. Racial disparities in asthma-related health  
674 outcomes in severe or difficult-to-treat asthma. *Ann Allergy Asthma Immunol.* 2008;101:  
675 256–263. doi:10.1016/S1081-1206(10)60490-5
- 676 53. Boudreaux ED, Emond SD, Clark S, Camargo CA. Acute asthma among adults presenting to  
677 the emergency department: the role of race/ethnicity and socioeconomic status. *Chest.*  
678 2003;124: 803–812. doi:10.1378/chest.124.3.803
- 679 54. Hiscock R, Bauld L, Amos A, Fidler JA, Munafò M. Socioeconomic status and smoking: a  
680 review. *Ann N Y Acad Sci.* 2012;1248: 107–123. doi:10.1111/j.1749-6632.2011.06202.x
- 681 55. Matthews KA, Gallo LC, Taylor SE. Are psychosocial factors mediators of socioeconomic  
682 status and health connections? *Ann N Y Acad Sci.* 2010;1186: 146–173.  
683 doi:10.1111/j.1749-6632.2009.05332.x
- 684 56. Wang Y, Beydoun MA. The obesity epidemic in the United States—gender, age,  
685 socioeconomic, racial/ethnic, and geographic characteristics: a systematic review and meta-  
686 regression analysis. *Epidemiol Rev.* 2007;29: 6–28. doi:10.1093/epirev/mxm007
- 687 57. Williams DR. Race, socioeconomic status, and health: the added effects of racism and  
688 discrimination. *Ann N Y Acad Sci.* 1999;896: 173–188. doi:10.1111/j.1749-  
689 6632.1999.tb08114.x
- 690 58. Charles CZ. The dynamics of racial residential segregation. *Annu Rev Sociol.* 2003;29: 167–  
691 207. doi:10.1146/annurev.soc.29.010202.100002
- 692

693 **Supporting information**

694 **S1 Text. Supplementary Methods.**

695 **S1 Figure. Flowchart of patient cohort selection.** Overview of steps followed to select final  
696 patient cohort (N = 6,656) from EHR data on all Penn Medicine patients with at least one asthma  
697 ICD code (N = 86,787).

698 **S2 Figure. Selection of study region using the spatial representation ratio (SRR).** (A) SRR  
699 values, defined as the cohort population residing in a block group divided by the underlying  
700 population as reported by the 2019 American Community Survey, for all of Philadelphia and for  
701 the selected study region (inset box). SRR = 1 indicates no representativeness bias. Density plots  
702 of the study cohort (B) before and (C) after filtering for the study region. Base maps were created  
703 using the Stamen Design from Stadia Maps.

704 **S3 Figure. Spatial distribution of SEDH datasets that were integrated with EHR data.**

705 The following maps are shown for the spatial area which comprised our study region: (A) raster  
706 of NO<sub>2</sub> pollution levels, (B) raster of PM<sub>2.5</sub> pollution levels, (C) point sites of toxic releases and  
707 the total summed emissions at each site, (D) line segments of roadways and the daily vehicle  
708 miles traveled (DVDT) on each, (E) housing violations per block group, normalized by the  
709 underlying 2019 American Community Survey population, (F) raster of the normalized  
710 difference vegetation index (NDVI). A map of area deprivation index (ADI), which most  
711 strongly reduced the spatial variance of odds of exacerbation risk in our spatial GAMs, is shown  
712 in Figure 3A. Base maps were created using the Stamen Design from Stadia Maps.

713 **S4 Figure. Pairwise correlation between all EHR and SEDH variables.** Measures in each box  
714 correspond to Pearson's correlation coefficients. For nominal categorical variables, reference  
715 levels are as follows: White (race), Private (health insurance type).

716 **S5 Figure. Influence of individual EHR and SEDH variables on the odds ratio (OR) of the**  
717 **unadjusted spatial GAM.** Percent reduction in the variance of ORs across the study region for  
718 one-variable-at-a-time adjusted spatial GAMs compared to the unadjusted model. OR changes  
719 for models adjusted one variable at a time (in addition to years followed) are shown in blue.  
720 Multivariable models (both EHR-adjusted and EHR & SEDH-adjusted) are shown in red for  
721 comparison.

722 **S6 Figure. Spatial GAMs adjusted one-at-a-time for the EHR-derived variables that did**  
723 **not greatly reduce variance.** Spatial odds ratios (ORs) of exacerbation are shown after  
724 adjusting for years followed and one-at-a-time for the following variables whose percent  
725 reduction in variance of ORs was less than 25: (A) age, (B) sex, (C) ethnicity, (D) BMI, (E)  
726 smoking status, (F) COPD, (G) allergic rhinitis, (H) Elixhauser comorbidity score, (I) ICS. Base  
727 maps were created using the Stamen Design from Stadia Maps.

728 **S7 Figure. Spatial GAMs adjusted one-at-a-time for the SEDH variables that did not**  
729 **greatly reduce variance.** Spatial odds ratios (ORs) of exacerbation are shown after adjusting for  
730 years followed and one-at-a-time for the following variables whose reduction in variance of ORs  
731 was less than 25: (A) NO<sub>2</sub>, (B) PM<sub>2.5</sub>, (C) toxic releases exposure, (D) vehicular traffic, (E)  
732 housing violations, (F) normalized difference vegetation index (NDVI). Base maps were created  
733 using the Stamen Design from Stadia Maps.

734 **S8 Figure. Spatial odds ratios (ORs) of exacerbations among White patients along with the**  
735 **effects of ADI and health insurance type on this distribution.** (A) SRR values for the updated  
736 study region used in spatial GAMs for patients of White race only (SRR = 1 indicates no  
737 representativeness bias). (B) Unadjusted spatial GAM adjusted only for years followed for  
738 patients of White race (N = 1,383). Spatial GAMs adjusted additionally for (C) area deprivation

739 index (ADI) and (D) health insurance type. Base maps were created using the Stamen Design  
740 from Stadia Maps.

741 **S1 Table. Generic medication names included in medication classes.** The following generic  
742 drug names recorded in the EHR during the study period were used for asthma and exacerbation  
743 phenotyping as well as used as independent variables in select models (i.e., ICS). Instances in  
744 which these drugs were listed as investigational or nasal formulations were not included.

745 **S2 Table. Sources and spatiotemporal dimensions of geospatial datasets merged with EHR**  
746 **data.**

747 **S3 Table. Asthma-related housing code violations extracted from the Philadelphia**  
748 **Department of Licenses and Inspections.**

749 **S4 Table. Patient medications by exacerbation count levels.** Shown are the number and  
750 percentage of patients receiving each of the medication types listed according to their number of  
751 exacerbations during the study period.

752 **S5 Table. Characteristics of complete cases and patients excluded due to missingness.**  
753 Shown are the number and percentage of patients in each level for categorical variables and the  
754 Median and Interquartile Range (IQR) for the Years followed variable in complete cases versus  
755 those excluded due to missingness in the sex, ethnicity, health insurance type, BMI, and smoking  
756 status variables.

757 **S6 Table. Adjusted Generalized Variance Inflation Factors (GVIFs) for each EHR and**  
758 **SEDH variable included in the EHR & SEDH-adjusted negative binomial and logistic**  
759 **regression models.**

760 **S7 Table. Individual-level asthma exacerbation risk factors in multivariable negative**  
761 **binomial regression models.** Shown are the adjusted incidence rate ratios (IRRs), 95%



762 confidence intervals (CIs), and p-values for negative binomial models of asthma exacerbations as  
763 a count outcome adjusted for EHR-derived variables only and for both EHR-derived and SEDH  
764 variables.

765 **S8 Table. Spatial GAMs of asthma exacerbations adjusted for individual risk factors that**  
766 **most changed risk.** Shown are the adjusted odds ratios (ORs), 95% confidence intervals (CIs),  
767 and p-values for spatial GAMs of asthma exacerbations as a dichotomous outcome adjusted for  
768 years followed and one-at-a-time for ADI, race, and health insurance type, the three variables  
769 whose percent reduction in variance of ORs was greater than 25.



# Linking EHR with SEDH data

Electronic Health Records  
(N = 86,787)

Jan 1, 2017

Dec 31, 2020

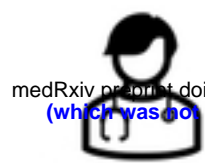

Diagnoses

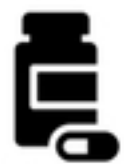

Medications

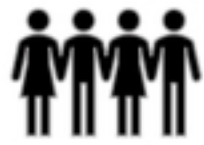

Demographics

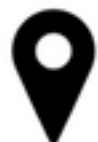

Addresses

Asthma  
phenotype

Asthma  
exacerbation  
definition

Geocoding

SEDH Datasets

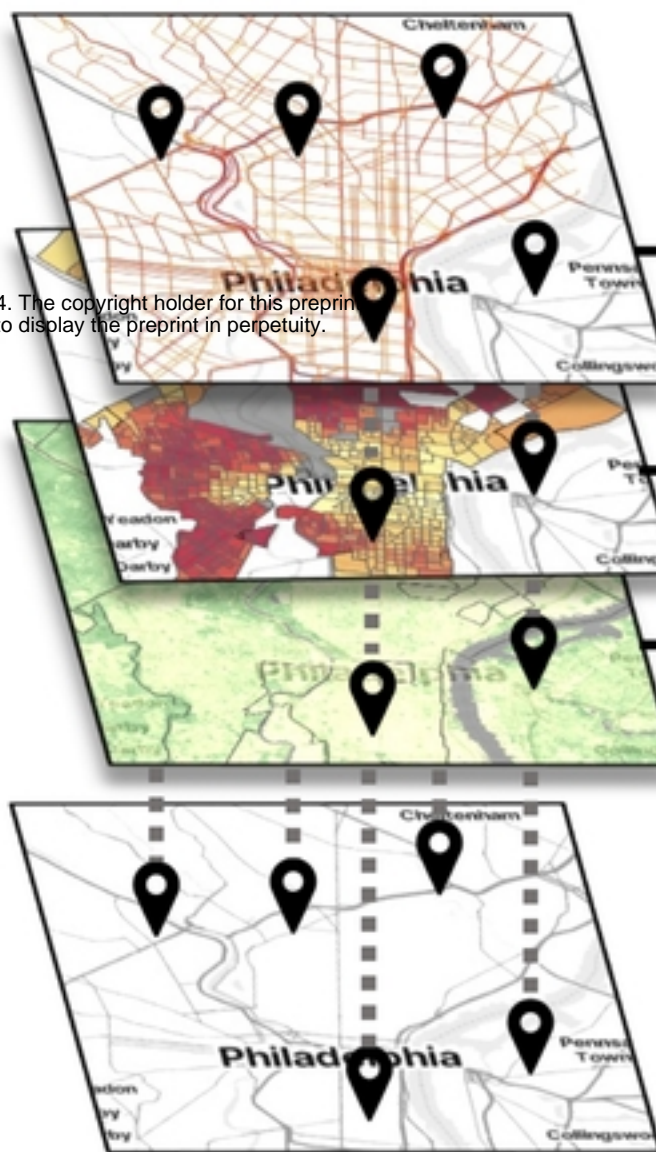

Air pollution  
exposures

Neighborhood  
socioeconomic  
environment

Built and natural  
environment

## Cohort selection

Asthma  
phenotype  
criteria

Inclusion  
criteria

Exclusion  
criteria

Spatial  
representation

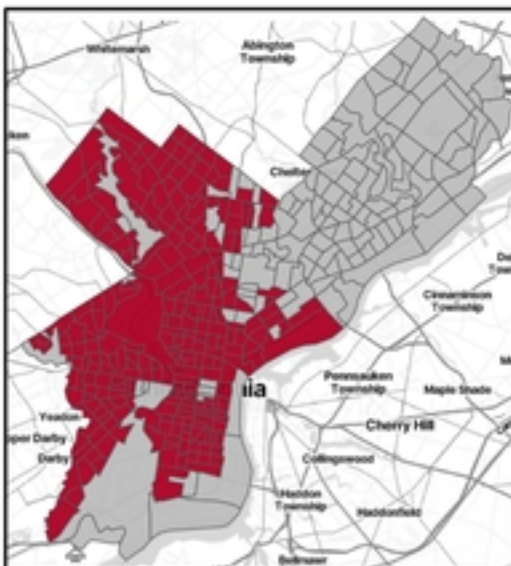

## Analysis of expanded EHR

EHR  
variables

SEDH  
variables

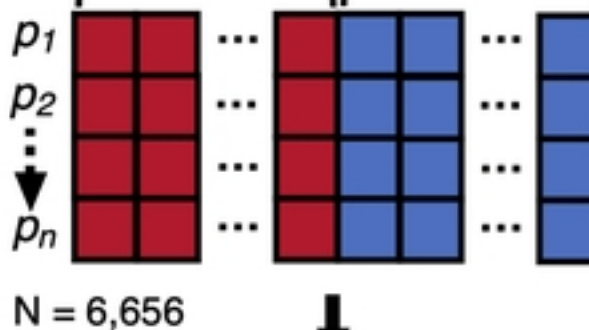

**Logistic & negative  
binomial models**  
Individual-level risk factor  
identification

**Spatial GAMs**

1. Hotspot  
detection

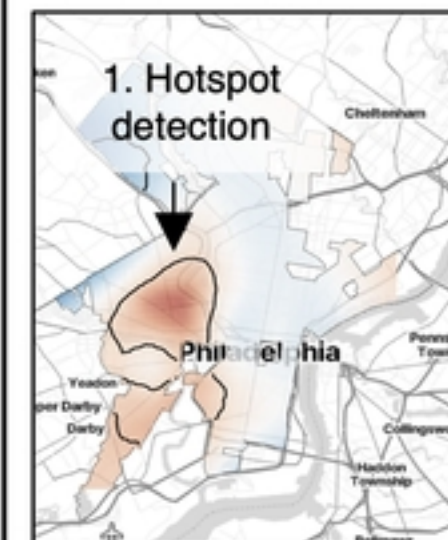

2. Spatial risk  
factor identification

Figure 1



### (A) Univariable

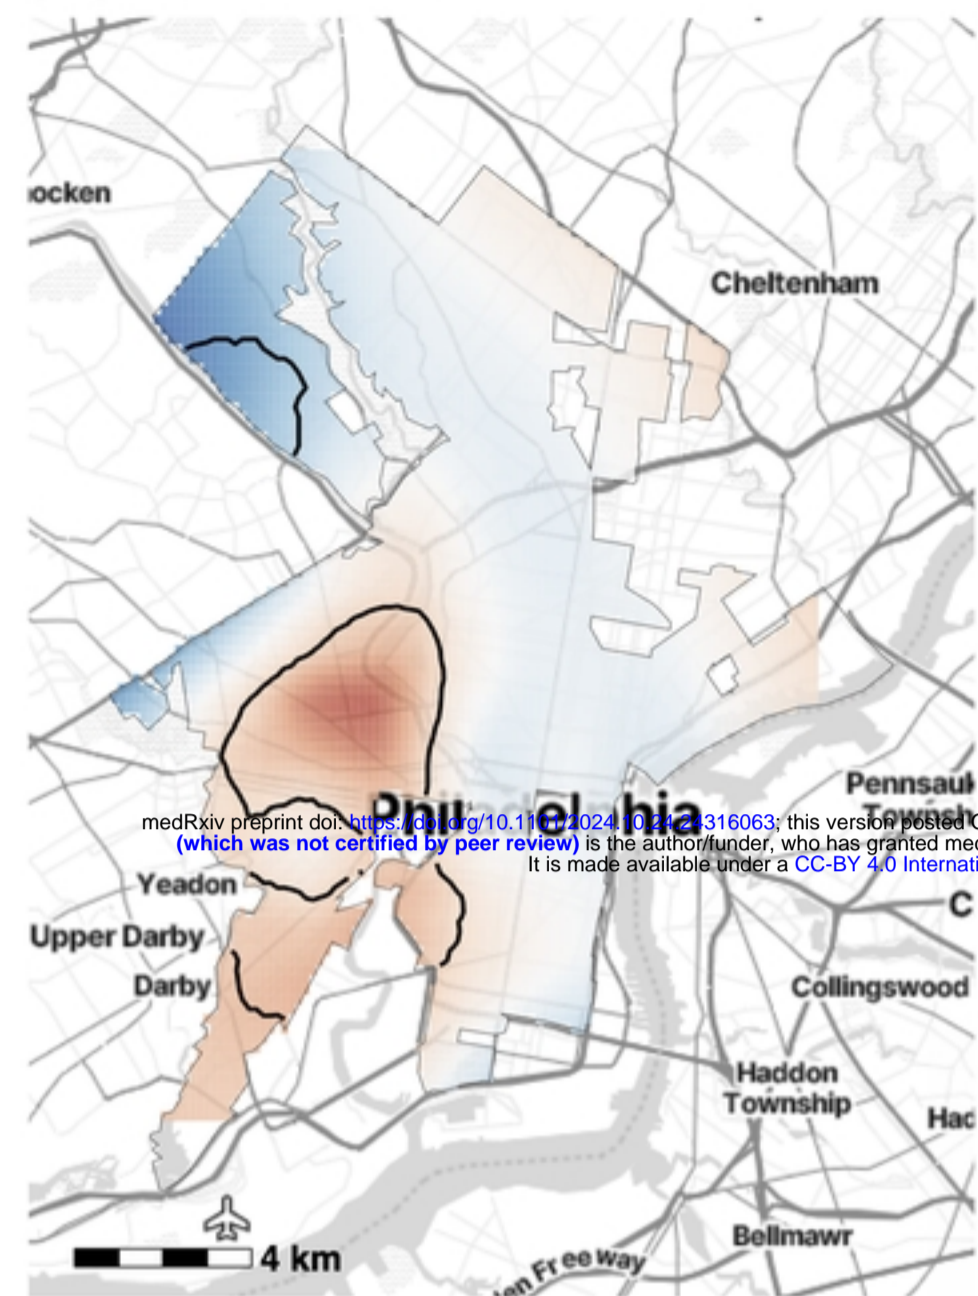

### (B) EHR-adjusted

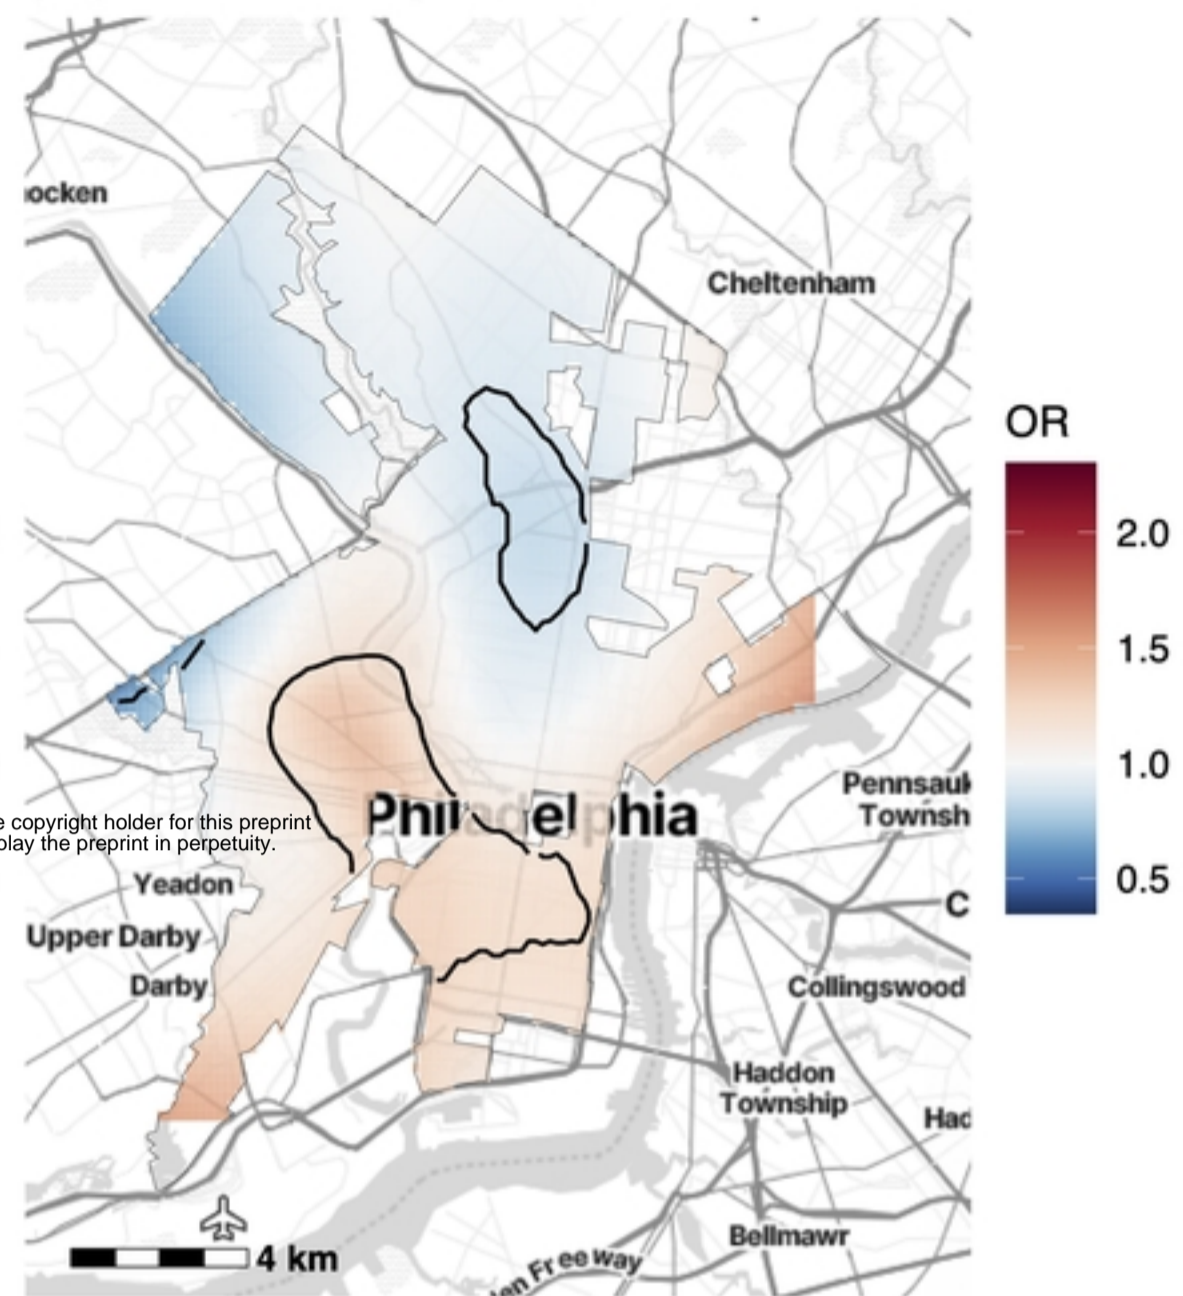

### (C) EHR & SEDH-adjusted

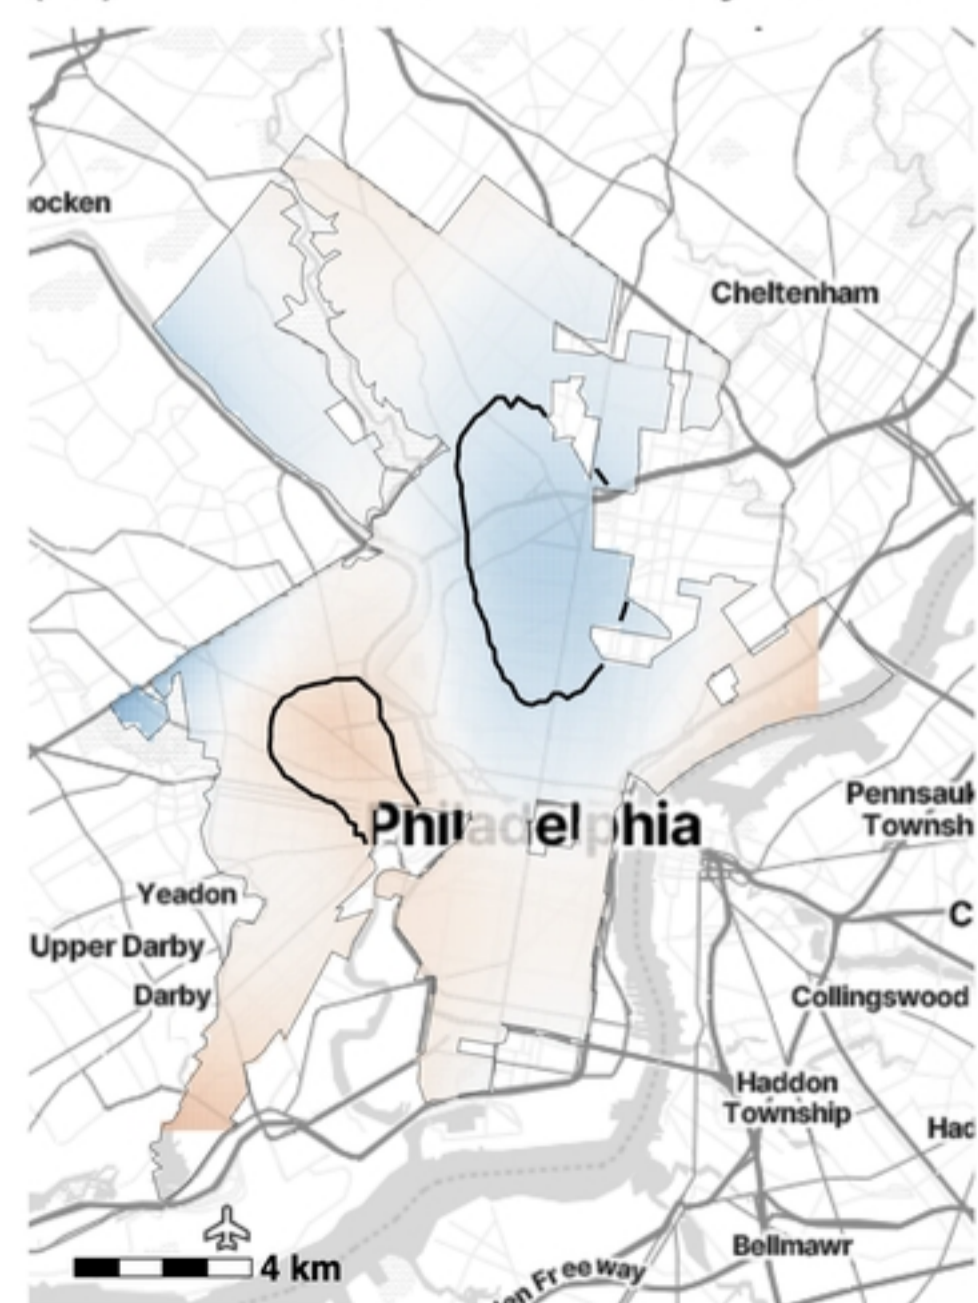

Figure 2



(A) ADI distribution

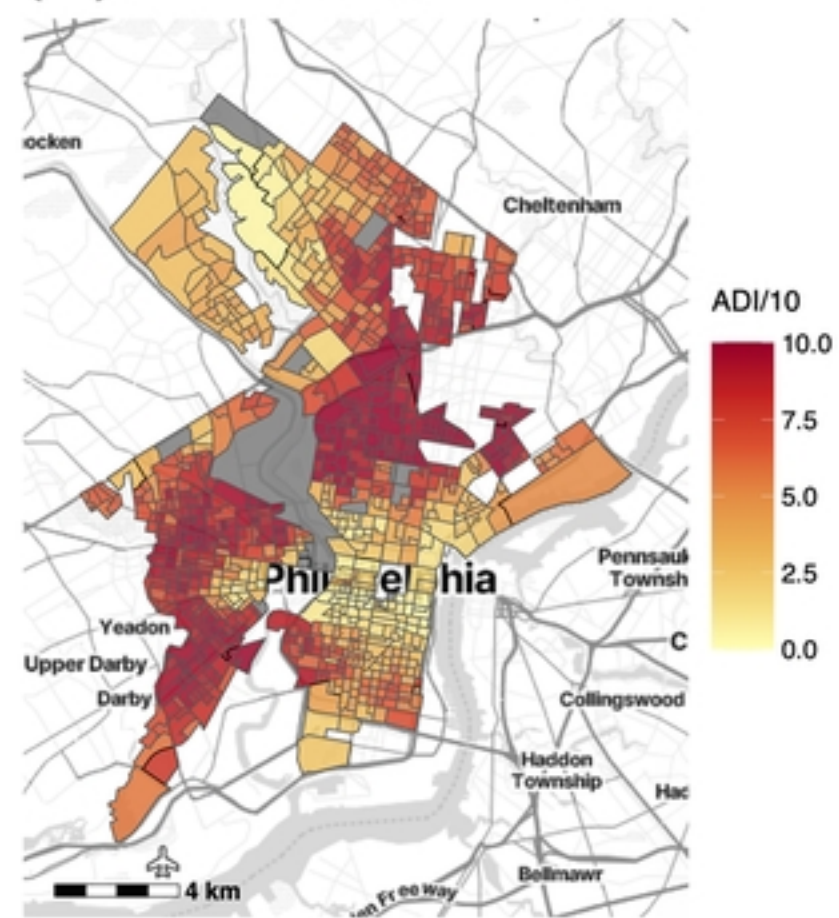

(D) ADI-adjusted GAM

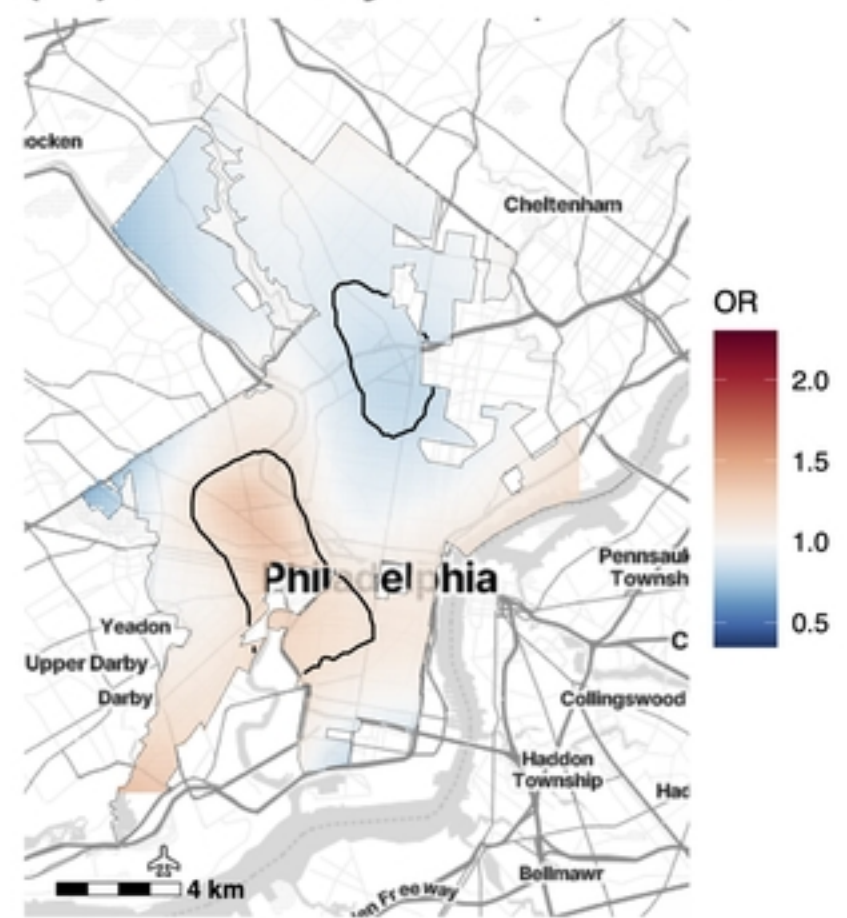

(B) Race distribution

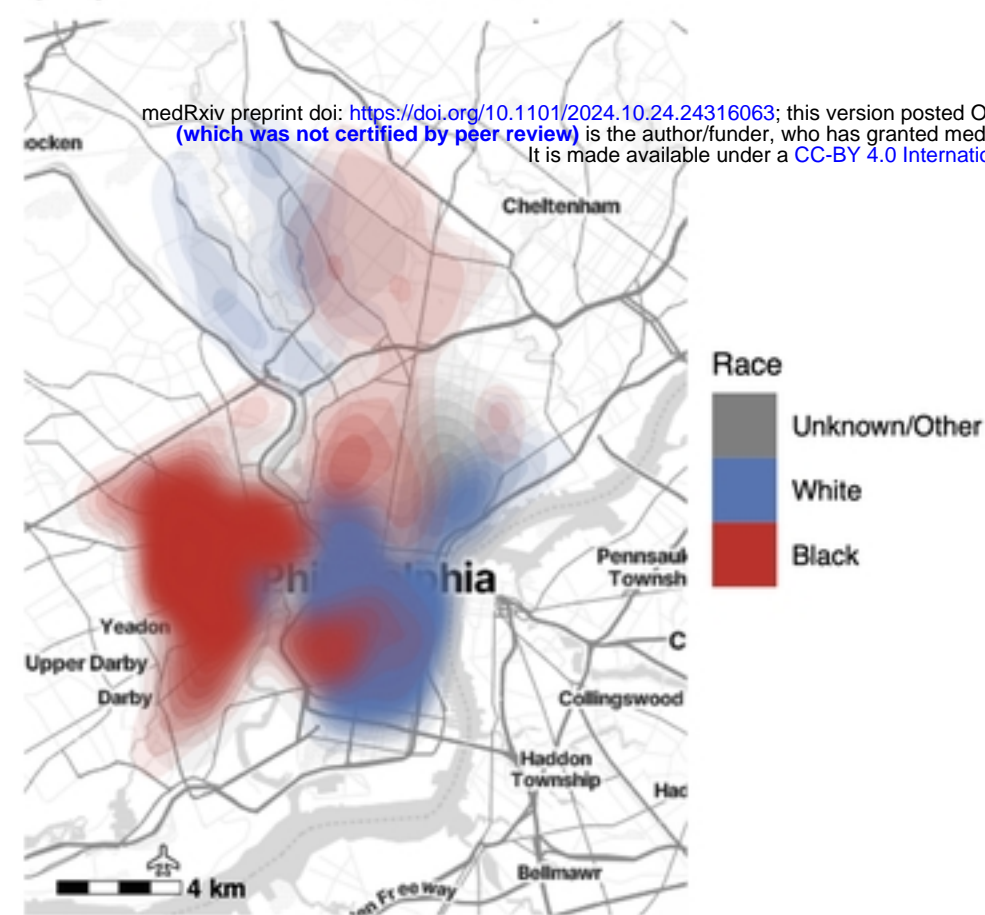

(E) Race-adjusted GAM

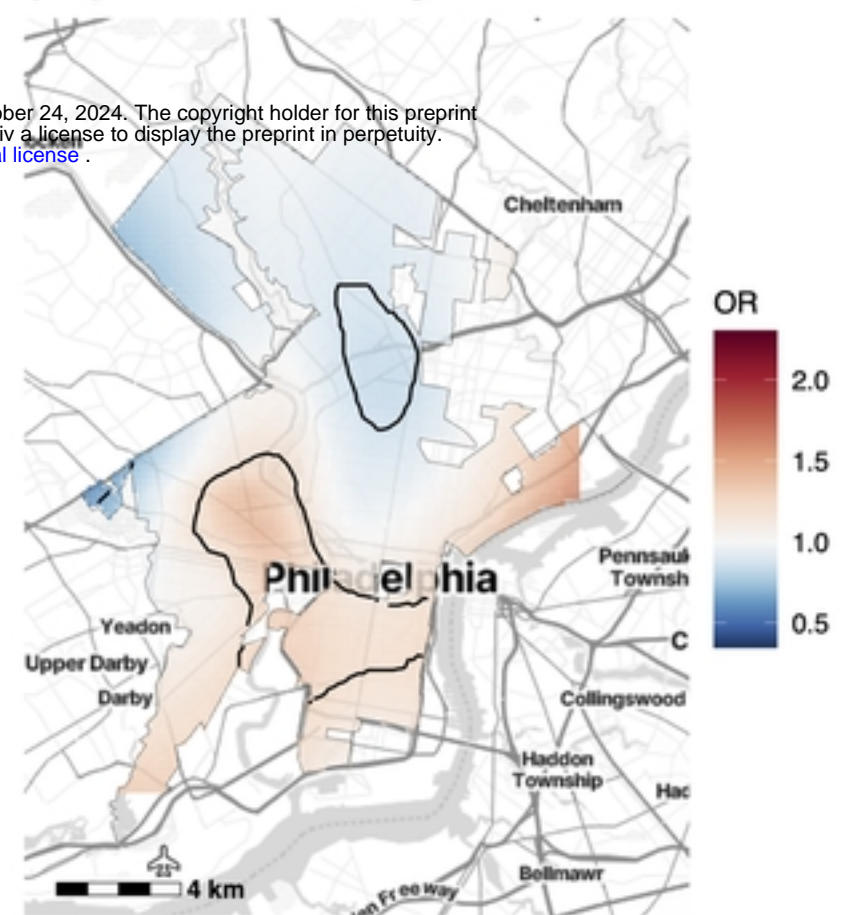

(C) Health insurance type distribution

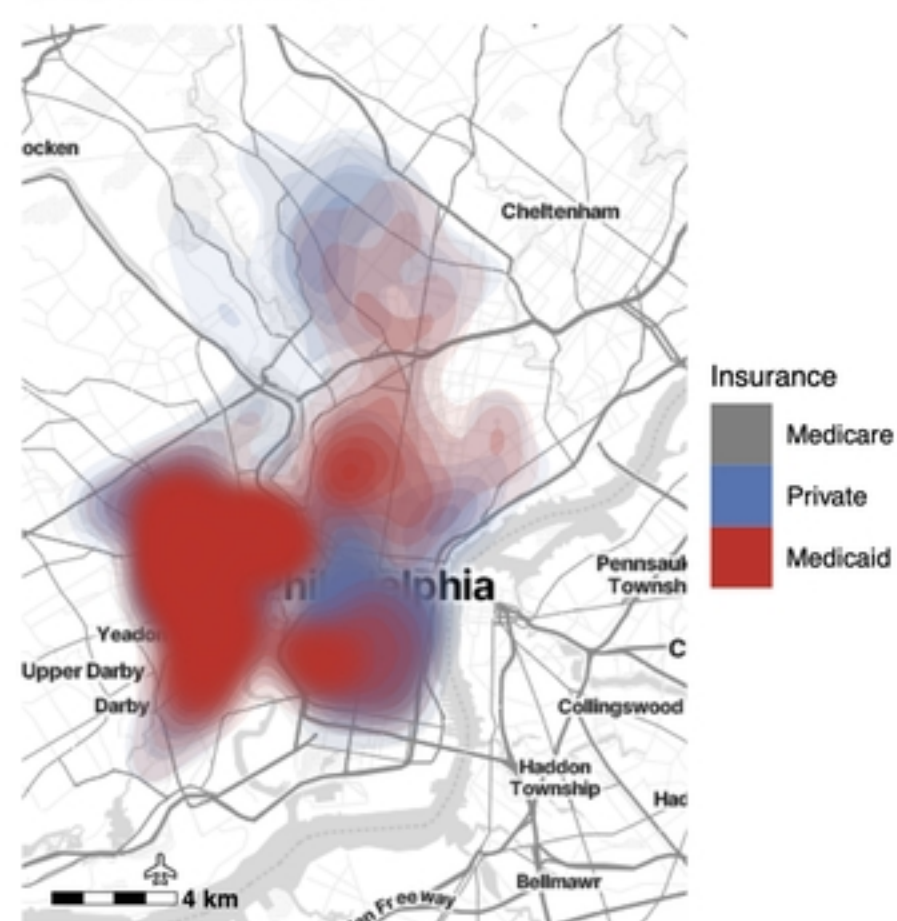

(F) Health insurance type-adjusted GAM

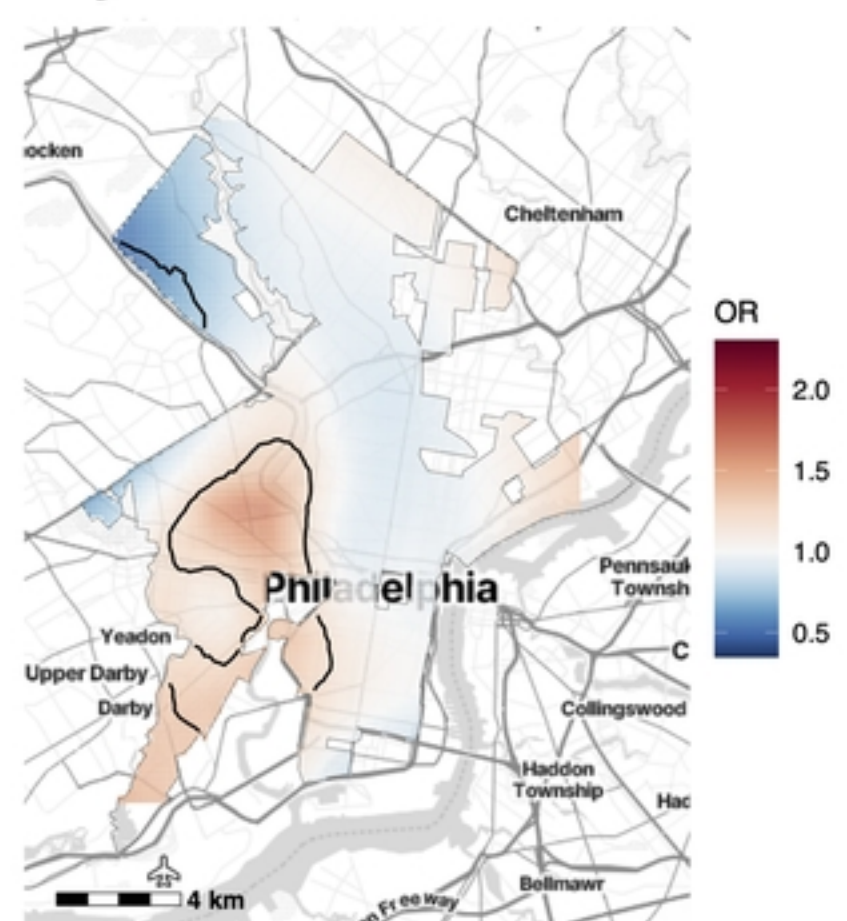

Figure 3



(A) Stratified SRR selection

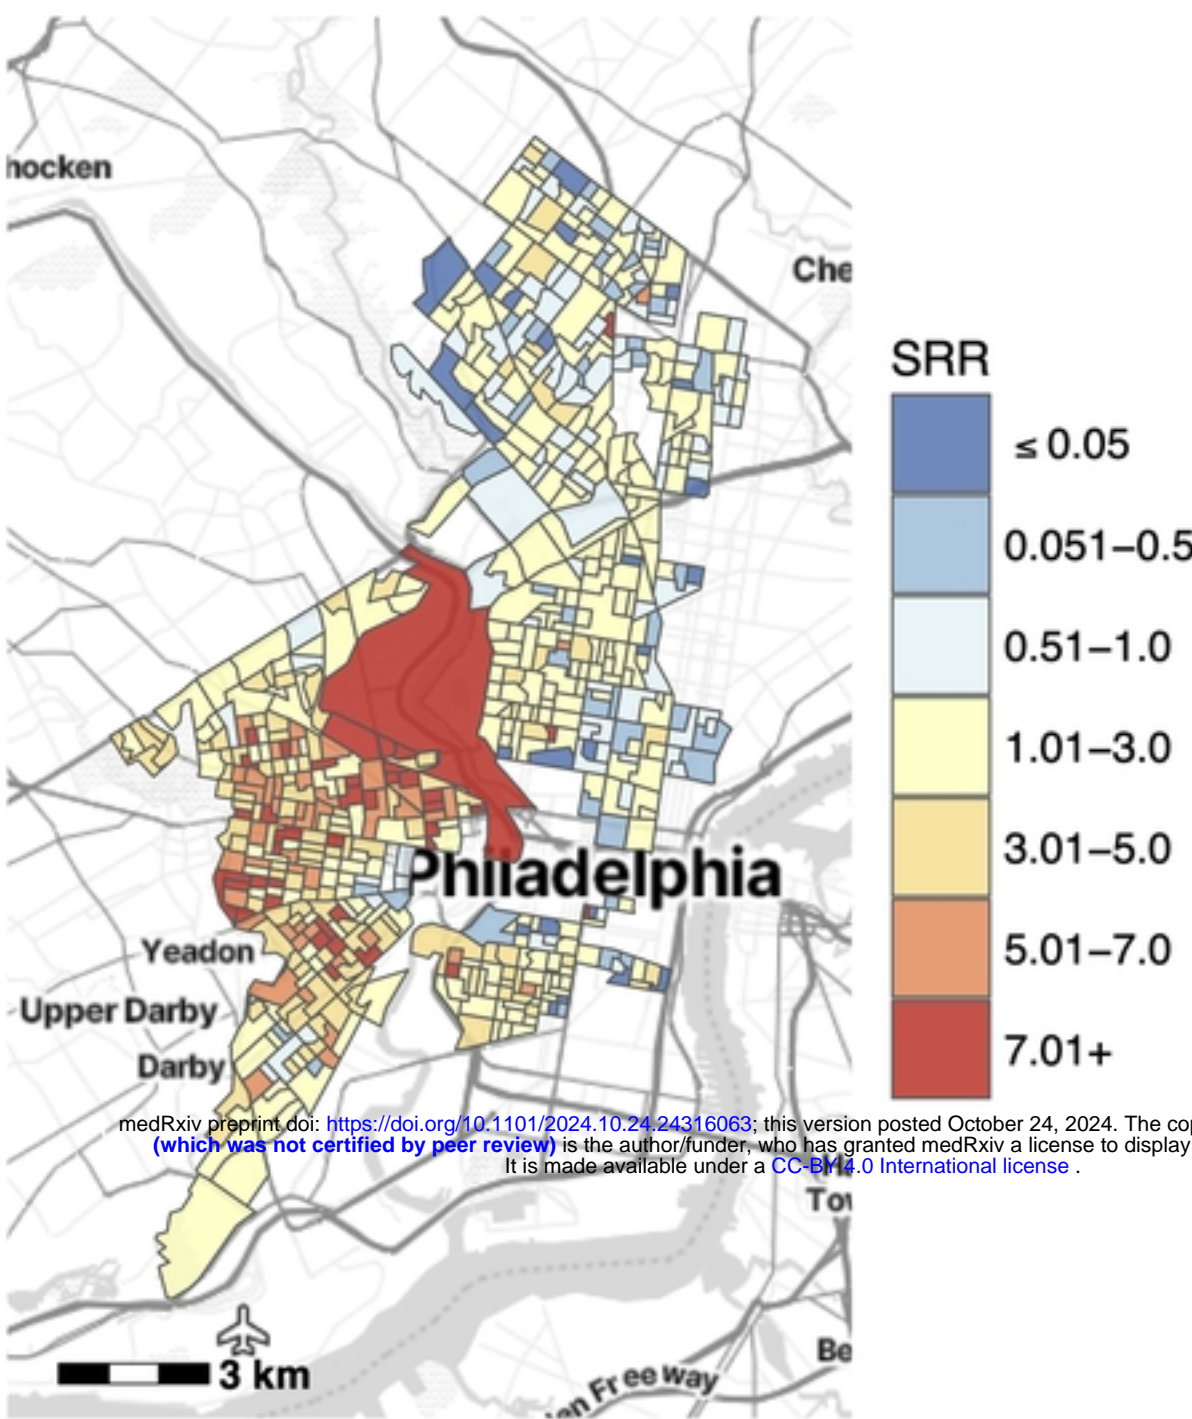

(B) Univariable GAM

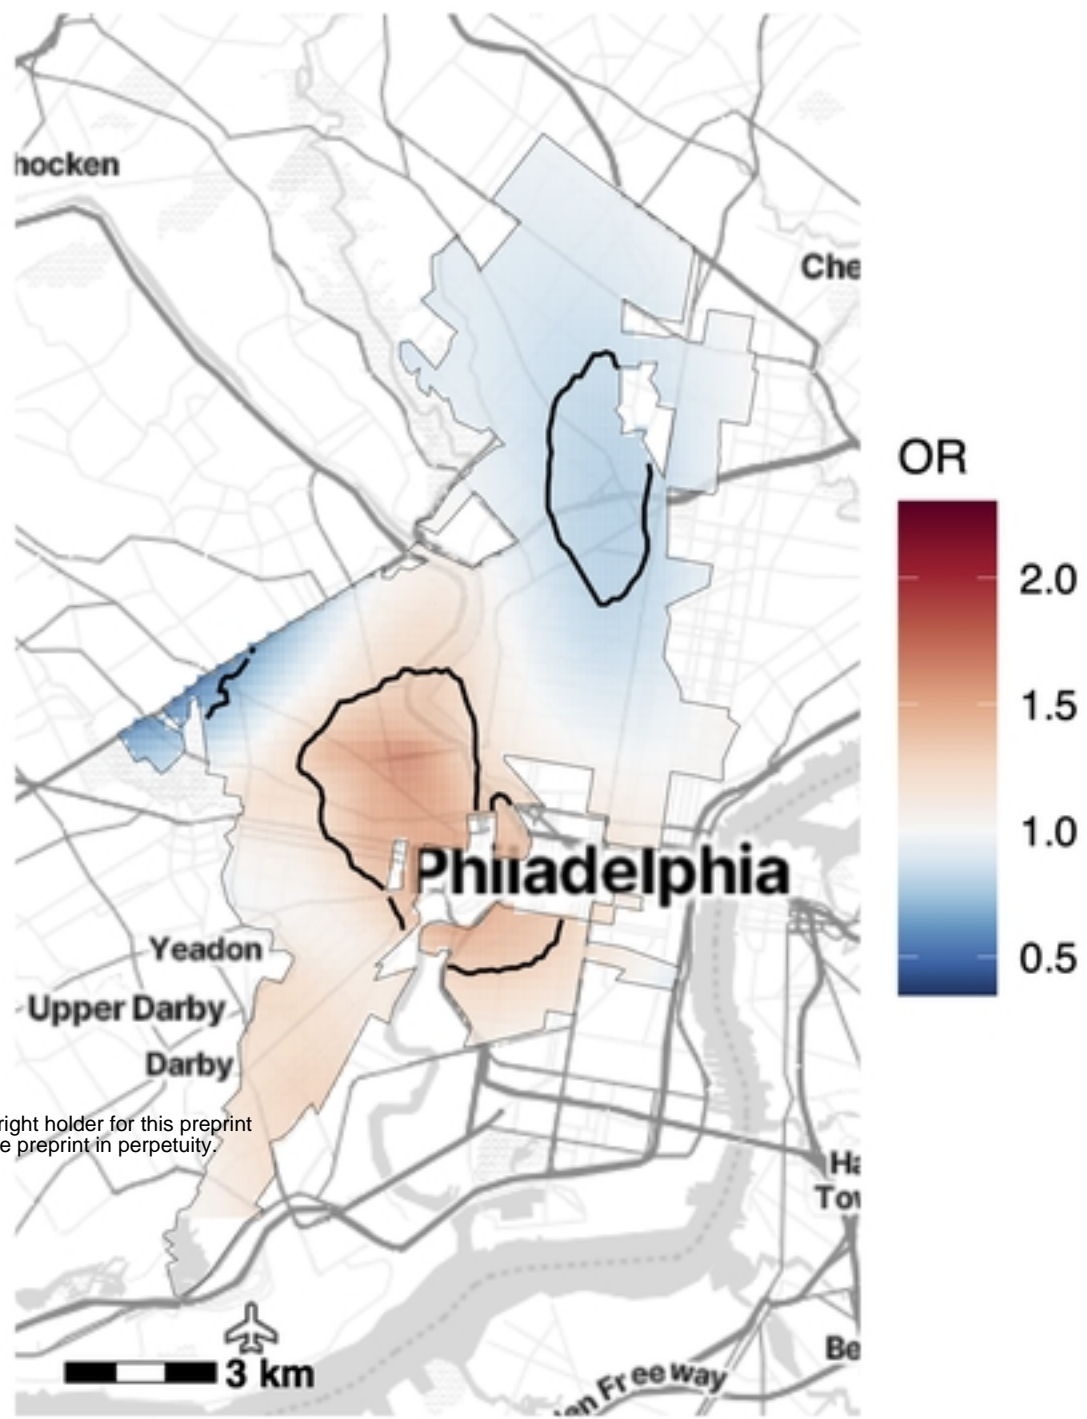

(C) ADI-adjusted GAM

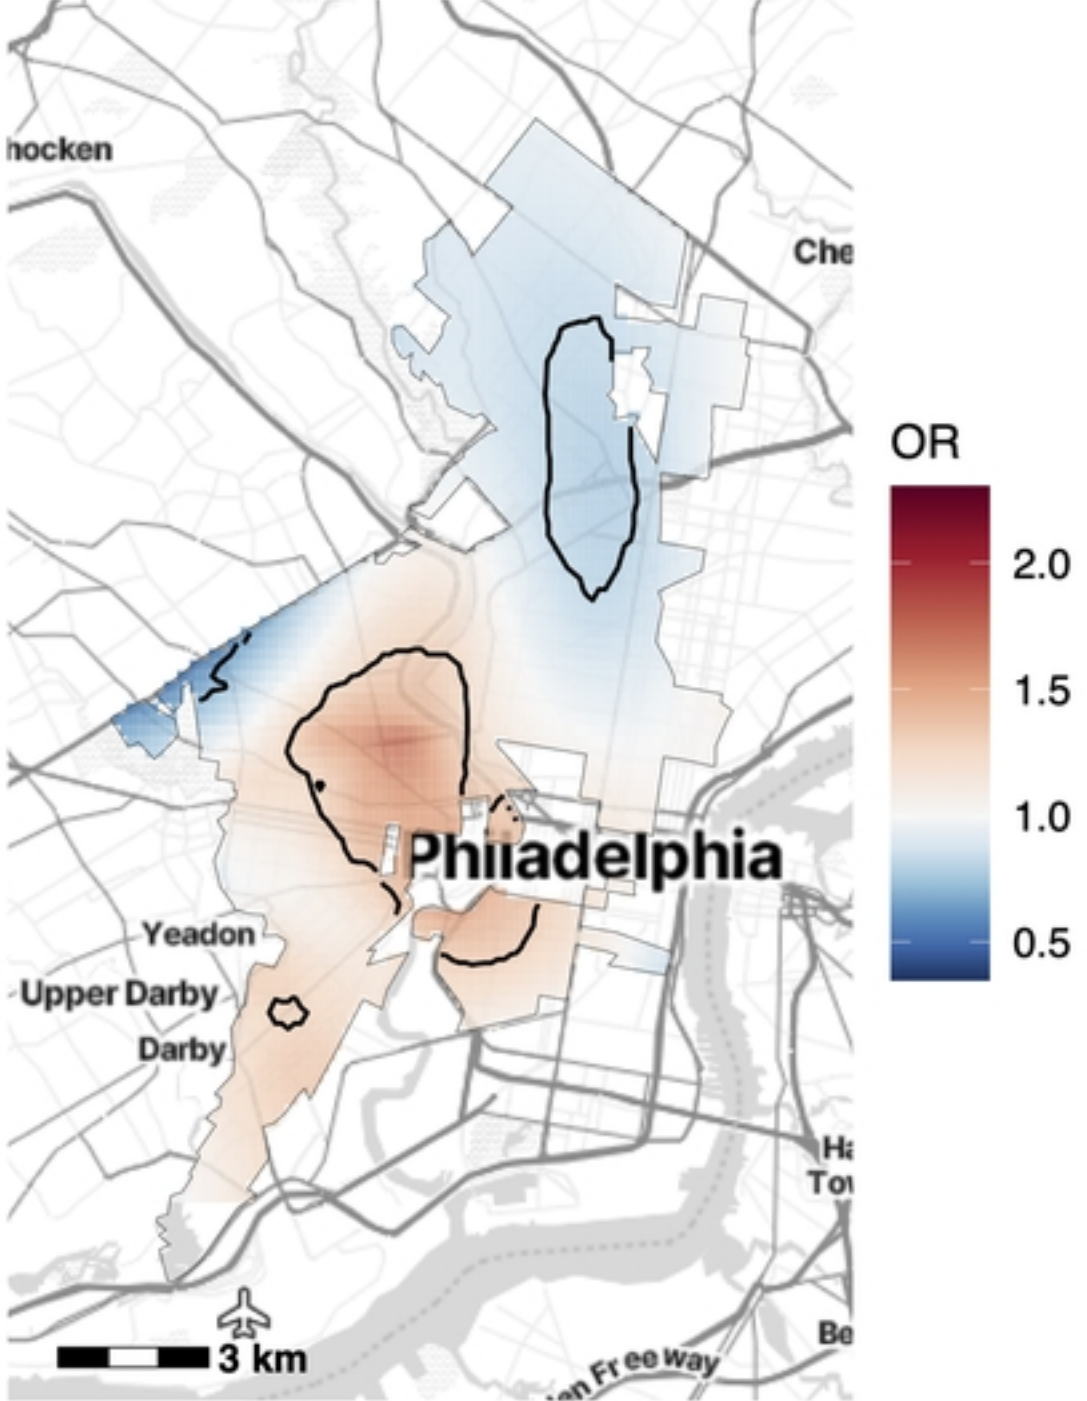

(D) Health insurance type-adjusted GAM

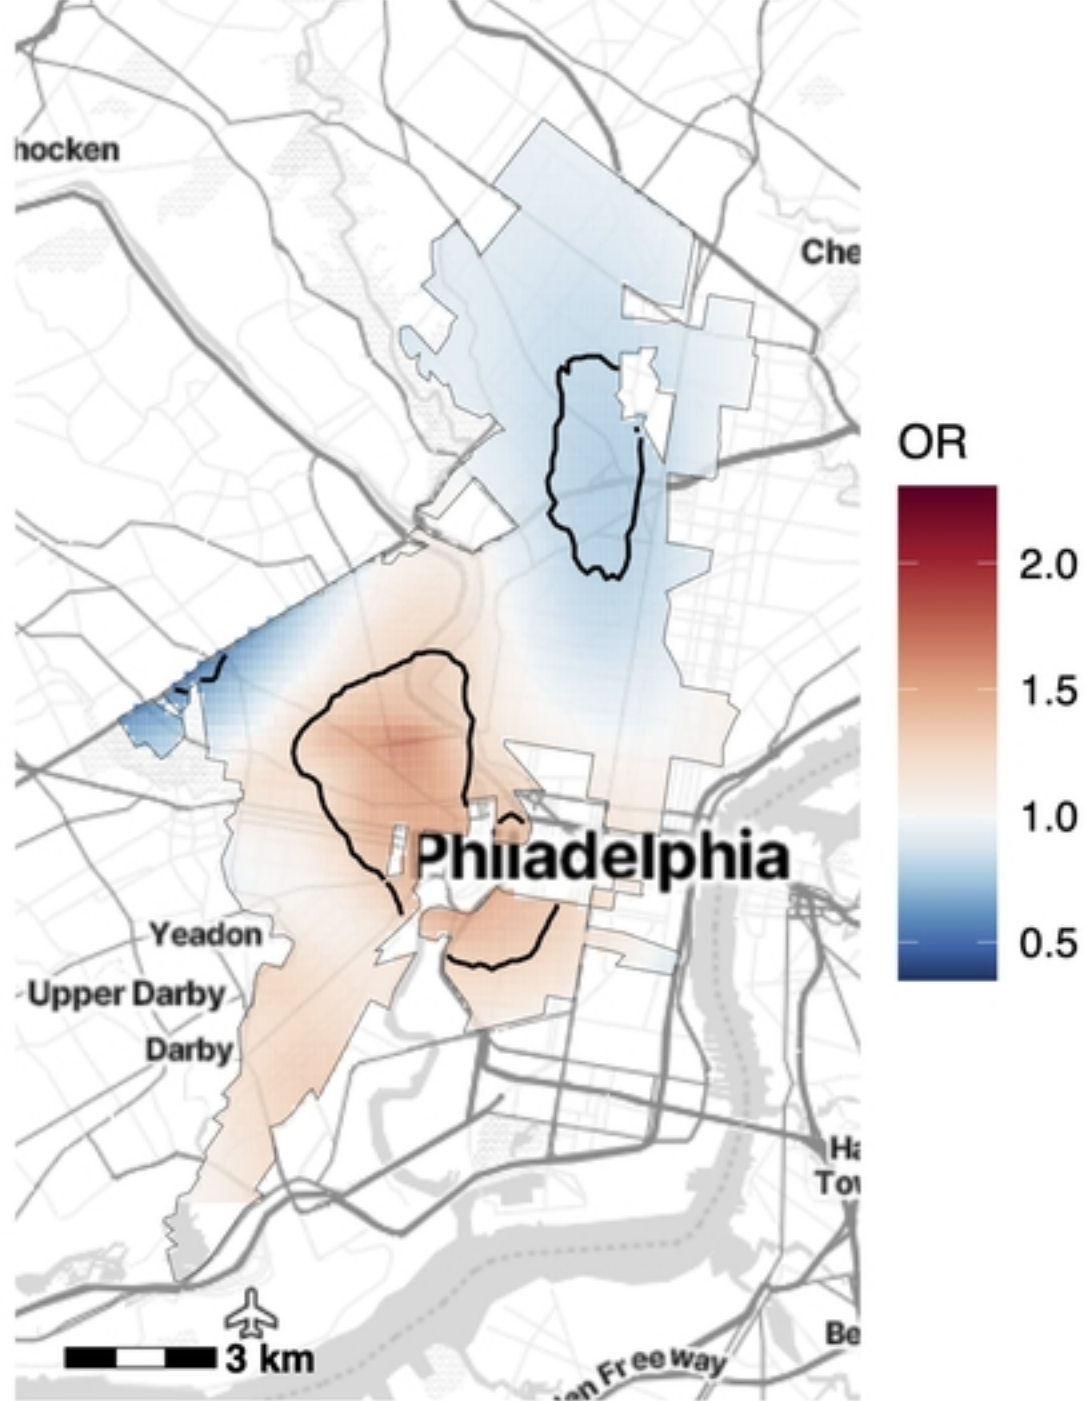

medRxiv preprint doi: <https://doi.org/10.1101/2024.10.24.24316063>; this version posted October 24, 2024. The copyright holder for this preprint (which was not certified by peer review) is the author/funder, who has granted medRxiv a license to display the preprint in perpetuity. It is made available under a CC-BY 4.0 International license.

Figure 4
